# Supplementary material for: Ethical dilemmas in providing acute medical care at home for children: a survey of health professionals
Source: PubMed Central journal article supplement — BMJ Paediatr Open. 2020 Feb 6;4(1):e000590. doi: 10.1136/bmjpo-2019-000590 (PMC7015051; doi:10.1136/bmjpo-2019-000590), 2020-02-06

# BMJ Paediatrics Open

BMJ Paediatrics Open is committed to open peer review. As part of this commitment we make the peer review history of every article we publish publicly available.

When an article is published we post the peer reviewers' comments and the authors' responses online. We also post the versions of the paper that were used during peer review. These are the versions that the peer review comments apply to.

The versions of the paper that follow are the versions that were submitted during the peer review process. They are not the versions of record or the final published versions. They should not be cited or distributed as the published version of this manuscript.

BMJ Paediatrics Open is an open access journal and the full, final, typeset and author-corrected version of record of the manuscript is available on our site with no access controls, subscription charges or pay-per-view fees (<http://bmjpaedsopen.bmj.com>).

If you have any questions on BMJ Paediatrics Open's open peer review process please email [info.bmjpo@bmj.com](mailto:info.bmjpo@bmj.com)

# BMJ Paediatrics Open

## Ethical dilemmas in providing acute medical care at home for children

|                               |                                                                   |
|-------------------------------|-------------------------------------------------------------------|
| Journal:                      | <i>BMJ Paediatrics Open</i>                                       |
| Manuscript ID                 | bmjpo-2019-000590                                                 |
| Article Type:                 | Original research                                                 |
| Date Submitted by the Author: | 09-Oct-2019                                                       |
| Complete List of Authors:     | Bryant, Penelope; The Royal Children's Hospital, General Medicine |
| Keywords:                     | Ethics, Adolescent Health, Cystic Fibrosis                        |
|                               |                                                                   |

SCHOLARONE™  
Manuscripts

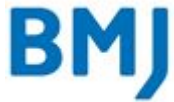

I, the Submitting Author has the right to grant and does grant on behalf of all authors of the Work (as defined in the below author licence), an exclusive licence and/or a non-exclusive licence for contributions from authors who are: i) UK Crown employees; ii) where BMJ has agreed a CC-BY licence shall apply, and/or iii) in accordance with the terms applicable for US Federal Government officers or employees acting as part of their official duties; on a worldwide, perpetual, irrevocable, royalty-free basis to BMJ Publishing Group Ltd ("BMJ") its licensees and where the relevant Journal is co-owned by BMJ to the co-owners of the Journal, to publish the Work in this journal and any other BMJ products and to exploit all rights, as set out in our [licence](#).

The Submitting Author accepts and understands that any supply made under these terms is made by BMJ to the Submitting Author unless you are acting as an employee on behalf of your employer or a postgraduate student of an affiliated institution which is paying any applicable article publishing charge ("APC") for Open Access articles. Where the Submitting Author wishes to make the Work available on an Open Access basis (and intends to pay the relevant APC), the terms of reuse of such Open Access shall be governed by a Creative Commons licence – details of these licences and which [Creative Commons](#) licence will apply to this Work are set out in our licence referred to above.

Other than as permitted in any relevant BMJ Author's Self Archiving Policies, I confirm this Work has not been accepted for publication elsewhere, is not being considered for publication elsewhere and does not duplicate material already published. I confirm all authors consent to publication of this Work and authorise the granting of this licence.

## Ethical dilemmas in providing acute medical care at home for children

Penelope A. Bryant, PhD<sup>1,2,3,4</sup>

1 Hospital-in-the-Home Department

2 Infectious Diseases Unit, Department of General Medicine

3 Clinical Paediatrics Group, Murdoch Children's Research Institute

4 Department of Paediatrics, University of Melbourne

all at: The Royal Children's Hospital Melbourne, Australia

**Abstract word count:** 250

**Manuscript word count:** 2,499

**Keywords:** Hospital-in-the-Home, Hospital-at-Home, Medical Home, Outpatient

Parenteral Antibiotic Therapy, Ethics

### Corresponding author:

A/Prof Penelope Bryant

Hospital-in-the-Home Department

The Royal Children's Hospital Melbourne

Parkville, VIC 3052

Australia

Ph: +61393455522

Email: penelope.bryant@rch.org.au

**ABSTRACT**

**Objective:** Acute care at home is increasing. We aimed to determine the views of healthcare professionals on the ethics of providing home care.

**Design:** An analysis of opinions of home healthcare professionals.

**Setting:** The Australasian Hospital-in-the-Home Annual Conference, November 2017.

**Participants:** Physicians, nurses and allied health staff who providing acute care for children and adults at home.

**Methods:** Clinical scenarios were presented about a 14-year-old receiving intravenous antibiotics at home, and participants were asked to vote manually on whether providing home care was ethical.

**Main Outcomes:** The proportion of healthcare professionals who believed that provision of home care was ethical in different situations.

**Results:** For each question the response rate ranged from 71-100%. While the provision of acute home care was deemed ethical by the majority (77/80, 96%), this decreased when other factors were involved such as domestic violence (37/63 (59%) OR 0.06 95%CI 0.02-0.20,  $p < 0.001$ ) and, parental reluctance (28/67 (42%) OR 0.02 95%CI 0.008-0.09,  $p < 0.001$ ). The age of consent against parental wishes affected the proportion who considered home care ethics: 16 years versus 14 years: OR 4.4 95% CI 1.9-10.1,  $p < 0.001$ . The lowest proportion to consider home care ethical (16%) was when home care was deemed less than hospital care.

**Conclusions:** This is the first study to assess opinions of healthcare providers in applying the tenets of medical ethics (autonomy, non-maleficence, beneficence and justice) to acute home care to children. It provides a benchmark against which to assess other stakeholders' opinions and to allow reflection of this increasing practice.

## INTRODUCTION

Care at home for acute medical conditions is increasingly viewed and used as a viable alternative to hospital admission<sup>1 2</sup>. The rationale is for both patients and organisations. The majority of patients prefer to receive their care at home if possible, and have improved psychological outcomes and reduced risks associated with admission such as hospital-acquired infections<sup>3 4</sup>. For organisations, improved flow of patients and reduced costs make home care attractive<sup>5 6</sup>. There is evidence in adults that safety and efficacy are comparable between home and hospital care in selected patients and conditions<sup>7</sup>. While the evidence for safety and efficacy in acute conditions is scarcer in children, this too is accumulating<sup>8-11</sup>. However, while there is some literature around the ethics of treating children with chronic conditions at home<sup>12 13</sup>, the ethical aspects of treating children at home for acute conditions have not previously been explored.

Ethical behaviour has been considered in medicine since Hippocrates, and the International Code of Medical Ethics<sup>14</sup>, or variants, have been adopted by many national medical associations<sup>15-18</sup>. These are based on the four principles of medical ethics described by Beauchamp and Childress: autonomy, non-maleficence, beneficence and justice<sup>19</sup>.

We aimed to understand the views of clinical professionals who provide home care on various ethical aspects of managing children with acute medical conditions at home that would otherwise necessitate hospital admission. Acute home programs have names including hospital-in-the-home and medical home, whereby nursing, medical and allied health staff provide at least daily medical interventions in the

1  
2  
3 home including intravenous antibiotics, acute wound dressings, chemotherapy, and  
4  
5 physiotherapy. We aimed to determine the ethical parameters within which home  
6  
7 healthcare professionals believe they should be providing care to children at home.  
8  
9

## 10 11 12 **METHODS**

13  
14  
15 **Setting:** The Australasian Hospital-in-the-Home (HITH) Annual Conference  
16  
17 November 2017.

18  
19  
20 **Participants:** Medical, nursing and allied health staff attendees to the conference, all  
21  
22 of whom provide clinical services to patients at home.

23  
24  
25 **Design:** All attendees were invited to a session titled 'Ethical dilemmas in HITH  
26  
27 practice'. The intention to survey opinions on ethical matters was explained and  
28  
29 attendees were invited to participate or not. Nobody left the session but four  
30  
31 attendees declined. Background was given on how ethical constructs can be used to  
32  
33 explore practical dilemmas. A non-clinical scenario was given to show there is often  
34  
35 no right answer, how ethical reasoning can be applied to either side of an argument,  
36  
37 and that increasing or changing available information can change how a situation is  
38  
39 viewed ethically. It was explained that several questions would be asked for which  
40  
41 there was no right answer and that the information they needed to make a fully  
42  
43 informed decision may not be there. For each question, participants could choose to  
44  
45 vote or not, and they were requested to hold up a blue sign if they thought the  
46  
47 situation was ethical and a red one if they thought not. Two people counted votes and  
48  
49 in case of discrepancy, a photograph was taken and attendees were assured these  
50  
51 would be destroyed after verification. The session used a fictitious situation based on  
52  
53 real dilemmas that arise in acute home care.  
54  
55  
56  
57  
58  
59  
60

1  
2  
3 **Main Outcomes:** The proportion of healthcare professionals who believed that  
4  
5  
6 provision of home care was ethical in different situations.

7  
8 **Statistical analysis:** Statistics are descriptive, with Chi-square test used for  
9  
10 comparisons to assess odds ratios (OR) with 95% confidence intervals (CI).

11  
12 **Patient and public involvement:** There were no patients or members of the public  
13  
14  
15 involved in any aspect of the study as it is an examination of opinions of clinical staff.

16  
17 **Ethics approval:** This was not required.  
18  
19  
20  
21

## 22 **RESULTS**

23  
24 Two test questions ascertained the maximum number of voting participants and  
25  
26 ensured an understanding of the process – the first aiming to elicit an ‘ethical’  
27  
28 response and the second a ‘not ethical’ response. 80/84 (95%) attendees  
29  
30 participated, all of whom voted ‘ethical’ for the first question and ‘not ethical’ for the  
31  
32 second question. For the clinical scenario, after each piece of additional information,  
33  
34 participants were asked to vote on ‘Is it ethical to provide a home service for this  
35  
36 patient in this situation?’ Response rates for each question ranged from 71-100%.  
37  
38  
39  
40  
41  
42

43 *Question 1. A 14-year-old girl with cystic fibrosis (CF) needs a planned episode of care*  
44  
45 *for an infective exacerbation. Your institution has a well-established home care*  
46  
47 *pathway for ‘CF tune-ups’ with intravenous antibiotics and physiotherapy. You offer her*  
48  
49 *home or hospital care and she chooses home.*  
50  
51

52 Home care was voted as ethical by a very high proportion of participants (77 votes,  
53  
54 96%), all of whom work in home care and are therefore familiar with it (table 1).  
55  
56  
57  
58  
59  
60



1  
2  
3 *Question 2. You discover that there is a history of domestic violence between adults in*  
4 *the household.*

5  
6  
7  
8 Compared to the previous response, the proportion (37/63, 59%) who thought  
9  
10 providing a home service was ethical when domestic violence was involved was  
11  
12 significantly decreased (OR 0.06 95%CI 0.02-0.20,  $p < 0.001$ ).

13  
14  
15  
16  
17 *Question 3a. You determine there is no current risk to nursing staff. However, the girl's*  
18 *mother tells you she is exhausted from chronic care of her child and was counting on*  
19 *hospital admission for respite.*

20  
21  
22  
23  
24 *3b. Her mother tells you if she doesn't get this respite, she will have to take unpaid leave*  
25 *and won't be able to afford to take everyone on a family holiday.*

26  
27  
28  
29 *3c. Her mother tells you if she doesn't get this respite, she will have to take unpaid leave*  
30 *and won't be able to afford to buy a wheelchair for her other child who has a disability.*

31  
32 Compared to the first response, the proportion (28/67, 42%) who thought providing  
33  
34 home care was ethical when the mother declared her reluctance due to exhaustion  
35  
36 was significantly decreased (OR 0.02 95%CI 0.008-0.09,  $p < 0.001$ ). Although there  
37  
38 was an increase when the admission request was to pay for a family holiday and a  
39  
40 decrease again when it was to pay for a wheelchair, these differences were not  
41  
42 significant.  
43  
44  
45  
46  
47  
48  
49

50  
51 *Question 4a. You are about to acquiesce to parental wishes, but the 14-year-old girl now*  
52 *insists that she wants to go home via HITH.*

53  
54  
55 *4b. What if the girl was 16 years old?*

56  
57 There was a significant difference with patient age (without any further information)  
58  
59 about whether it was deemed ethical to provide home care per the patient's wishes  
60

1  
2  
3 against parental wishes: 48/58 (83%) at 16 years versus 33/63 (52%) at 14 years  
4  
5 (OR 4.4 95% CI 1.9-10.1,  $p < 0.001$ ).  
6  
7  
8  
9

10 *Question 5. Everyone now agrees to proceed with treatment at home. However, the*  
11 *home care physiotherapist will be away during the treatment period, so the girl and her*  
12 *parents will need to do her physiotherapy.*  
13  
14  
15  
16

17 Compared to the first response, the unavailability of physiotherapy led to the lowest  
18 proportion (10/61, 16%) of all questions of those who felt providing home care in  
19 this scenario was ethical (OR 0.008 95%CI 0.002-0.03,  $p < 0.001$ ).  
20  
21  
22  
23  
24  
25

26 *Question 6. Your first visit to the home reveals a small apartment where the young girl's*  
27 *bedroom is her only sanctuary. This is currently full of medical equipment to facilitate*  
28 *her being at home.*  
29  
30  
31  
32

33 A high proportion of participants (63/64, 98%) voted that providing home care in  
34 this situation was ethical, with no difference from the original scenario (OR 2.5  
35 95%CI 0.2-24.1,  $p = 0.4$ ).  
36  
37  
38  
39  
40  
41  
42

43 *Question 7a. Towards the end of her HITH stay her peripherally-inserted central*  
44 *catheter (PICC) blocks and you are unable to insert a cannula despite repeated*  
45 *attempts. The options are intramuscular injection or reinsertion of the PICC, for which*  
46 *she would need admission for a general anaesthetic. You decide to give an*  
47 *intramuscular injection so she can continue at home as she only needs one more day of*  
48 *parenteral antibiotics.*  
49  
50  
51  
52  
53  
54  
55

56  
57 *7b. Two days of intramuscular injections.*  
58

59 *7c. Three days of intramuscular injections.*  
60

1  
2  
3 As the number of days of intramuscular injections at home in preference to admission  
4 for PICC replacement increased, the proportion of participants that felt this was  
5 ethical fell significantly (figure 1): 61/62 (98%) versus 31/60 (52%), OR 57 95%CI 7-  
6  
7  
8  
9  
10 439,  $p < 0.001$ ).

## 11 12 13 14 15 **DISCUSSION**

16  
17 This is the first examination of the application of ethical values to acute care for  
18 patients at home. The questions were designed to test various aspects of the four  
19  
20  
21  
22 tenets of medical ethics.

23  
24  
25  
26  
27 Patient autonomy refers to respectful treatment of patients by ensuring disclosure of  
28 information and not constraining their right to make their own informed decision.

29  
30  
31 This is exemplified in the first question where information is given to the patient and  
32 she decides between home care and hospital admission. The strong vote that this was  
33  
34  
35  
36  
37  
38  
39  
40  
41  
42  
43  
44  
45  
46  
47  
48  
49  
50  
51  
52  
53  
54  
55  
56  
57  
58  
59  
60  
ethical indicates that participants feel there is sufficient evidence that home care is  
effective and safe. Insufficient information is given to assess whether there was  
patient coercion, which is prohibited by the concept of autonomy, but on the face of it,  
the process appears ethical. The decision becomes less clear, as highlighted by the  
drop in 'ethical' votes, when the patient's mother's autonomy is included. This  
question also raised whether different reasons underpinning her autonomy  
(exhaustion, lack of funds) affect the ethical construct, but these were not viewed by  
participants as having as much impact as the mere fact of her opposing decision. In  
adult medicine, the patient's autonomy is paramount with the wishes of spouses and  
children being secondary<sup>20 21</sup>. In paediatrics, autonomy regarding medical care lies  
with those (usually the parent/s) holding parental rights, but the age at which the

1  
2  
3 child's best interests are served by the child being autonomous is debated. More  
4  
5 participants felt it was ethical for a 16-year-old to provide consent than a 14-year-old.  
6  
7 The age at which a child can legally provide consent is different in different countries.  
8  
9  
10 In the UK, the test of 'Gillick competence' allows a minor under the legal age of  
11  
12 consent (16 years) to be assessed as sufficiently mature to understand and make  
13  
14 their own decisions and provide consent. This is in line with the ethical tenet of  
15  
16 autonomy, which relies on competence. This medical case law has essentially been  
17  
18 adopted in Australia and Canada, although only sporadically in the USA. However,  
19  
20 even if consent is given by the adolescent, each home care service may have its own  
21  
22 rules about whether an adult also needs to be present, which may supersede the  
23  
24 ethical aspects of who ultimately provides consent.  
25  
26  
27  
28  
29  
30

31 Non-maleficence refers to the duty to avoid causing harm including pain, suffering  
32  
33 and disablement. Beneficence refers to the duty to actively promote good for patients,  
34  
35 to defend their rights and to remove conditions that will cause harm. Although, they  
36  
37 are sometimes seen as two sides of the same coin, one can obey the dictates of non-  
38  
39 maleficence simply by refraining from acting, but beneficence requires positive  
40  
41 action. Several questions highlighted these dual tenets, essentially creating an ethical  
42  
43 dilemma, including provision of potentially invasive services in her place of  
44  
45 sanctuary: beneficence of active care provision for her health, but non-maleficence  
46  
47 requires not to the detriment to her psyche. However, as long as the patient is fully  
48  
49 informed and has consented, autonomy dictates that we should not be paternalistic.  
50  
51  
52 Any detrimental effects may also differ between short episodes of acute care and  
53  
54 ongoing chronic care where medical equipment might be a permanent fixture. The  
55  
56 benefits and harms are also raised in the question on intramuscular injections, with  
57  
58  
59  
60

1  
2  
3 increasing number (and therefore pain) correlating with decreasing acceptance. This  
4  
5 adds a level of complexity when deciding on the ethical imperatives between the  
6  
7 three options of home care, intramuscular injections and the small but serious  
8  
9 potential harm of a general anaesthetic.  
10  
11

12  
13  
14  
15 The issue of household domestic violence raises to whom the beneficence and non-  
16  
17 maleficence need to be applied. In this situation there is an obligation of specific  
18  
19 beneficence to the patient, and it potentially even increases the imperative for a  
20  
21 professional to visit the home. However, the ethical balance shifted for non-  
22  
23 responders when non-maleficence needed to be considered for a staff member  
24  
25 entering a potentially unsafe situation. Since there is a moral obligation to both, other  
26  
27 aspects should be considered to guide decision-making such as the vulnerability of  
28  
29 the individual and the risk of potential harm to either party, and for that more  
30  
31 information is required. It is, however, worth stating that it is rare for domestic  
32  
33 violence to be perpetrated against outsiders, and that the balance of most home  
34  
35 healthcare providers is to provide the care and, if necessary, have two staff members  
36  
37 visit together.  
38  
39  
40  
41  
42  
43  
44

45 Finally, justice refers to how benefits and burdens should be distributed. It mandates  
46  
47 the fair medical treatment of patients, with equal situations being treated equally, and  
48  
49 unequal situations being treated in proportion to their inequalities. A large majority  
50  
51 of participants felt it was not just to provide inferior treatment at home compared to  
52  
53 what would be offered in hospital, reflecting the importance of physiotherapy in CF  
54  
55 care. This is important because the concern around home care being inferior is a  
56  
57 barrier to acute home care for many institutions and clinical staff<sup>22 23</sup>. Robust  
58  
59  
60

1  
2  
3 evidence that home care is as efficacious and safe as hospital care for children is  
4  
5 increasing, but more is needed<sup>24</sup>. Of note, most home programs only provide daily  
6  
7 physiotherapy at home compared to twice daily in hospital, which is therefore  
8  
9 already less, yet this is considered acceptable by respiratory physicians. The concept  
10  
11 of 'good enough' has been discussed regarding parenting where perfection is not  
12  
13 deemed necessary. It may be appropriate to apply the same concept to home services  
14  
15 where the intensity of services is lower, but the quality must be as high. We did not  
16  
17 explore how good would be considered 'good enough' (eg physiotherapy via  
18  
19 telehealth, a physiotherapist visiting alternate days) or compare this with the risks of  
20  
21 inpatient admission. The other aspect is the balance of unequal situations. In a recent  
22  
23 study of home intravenous antibiotic treatment for cellulitis, it was shown that parent  
24  
25 and child quality of life was significantly higher at home and it cost three times less  
26  
27 for the family than in hospital<sup>24 25</sup>. The efficacy level (the primary outcome) for non-  
28  
29 inferiority was set lower for home than in hospital at the start of the trial<sup>26</sup> because of  
30  
31 the recognition of the benefits of home and acceptance of a proportionally lower level  
32  
33 of efficacy, although efficacy was actually found to be higher at home.  
34  
35  
36  
37  
38  
39  
40  
41  
42

43 Study limitations are that it only evaluated opinions of those providing home  
44  
45 services. Additionally, because it was not anonymous (the technology was unavailable  
46  
47 for electronic voting) people may have felt peer pressure to vote similarly, although  
48  
49 the differences in proportions for different questions suggest otherwise. The  
50  
51 questions were limited to clinical dilemmas, and did not include other ethical  
52  
53 dimensions to acute home care such as organisational issues (eg rationing or  
54  
55 payment of services<sup>27</sup>) and research.  
56  
57  
58  
59  
60

1  
2  
3 The tenets of medical ethics do not aim to provide answers, or even guidelines, for  
4  
5 managing moral issues; rather they provide a framework to identify and reflect upon  
6  
7 them. As the first survey of its kind, these results provide a benchmark against which  
8  
9 surveys of other groups regarding acute home care in children can be compared. The  
10  
11 next important step will be to obtain the opinions of patients, families and other  
12  
13 healthcare providers. The results show the importance of considering ethical aspects  
14  
15 of the provision of home care, both in building a service and in providing and  
16  
17 constantly improving the quality of delivering acute medical care to children at home.  
18  
19  
20  
21  
22  
23

### 24 **Acknowledgements**

25  
26 Thanks to those who participated in the survey. A/Prof Bryant is in receipt of a  
27  
28 Clinician Scientist Fellowship from the Murdoch Children's Research Institute, which  
29  
30 had no role in any aspect of the study.  
31  
32  
33  
34  
35

36 **Conflicts of interest:** This study was not funded and there are no conflicts of interest  
37  
38 to declare.  
39  
40  
41  
42  
43  
44  
45  
46  
47  
48  
49  
50  
51  
52  
53  
54  
55  
56  
57  
58  
59  
60

### What is already known on this topic

- Children are increasingly managed at home for treatment of acute conditions that would traditionally require hospital admission
- There is emerging evidence for the efficacy and safety of this approach, but a lack of discussion on the ethical aspects.

### What this study adds

- Healthcare providers who are familiar with acute home care believe this care follows the ethical tenets of autonomy, beneficence, non-maleficence and justice.
- Ethical dilemmas arise when other people such as staff members and parents need to be considered.
- Provision of home care was felt to be least ethical when it was deemed inferior clinically to hospital care.



## References

1. Bryant PA, Hopper SM. Alternatives to ward admission from the emergency department. *J Paediatr Child Health* 2016;52(2):237-40. doi: 10.1111/jpc.13100 [published Online First: 2016/04/12]
2. Sartain SA, Maxwell MJ, Todd PJ, et al. Users' views on hospital and home care for acute illness in childhood. *Health & social care in the community* 2001;9(2):108-17.
3. Ibrahim LF, Hopper SM, Connell TG, et al. Evaluating an admission avoidance pathway for children in the emergency department: outpatient intravenous antibiotics for moderate/severe cellulitis. *Emerg Med J* 2017;34(12):780-85. doi: 10.1136/emermed-2017-206829 [published Online First: 2017/10/06]
4. Strandvik B, Hjelte L, Malmborg AS, et al. Home intravenous antibiotic treatment of patients with cystic fibrosis. *Acta Paediatr* 1992;81(4):340-4. doi: 10.1111/j.1651-2227.1992.tb12239.x [published Online First: 1992/04/01]
5. Warner BW, Kulick RM, Stoops MM, et al. An evidenced-based clinical pathway for acute appendicitis decreases hospital duration and cost. *Journal of Pediatric Surgery* 1998;33(9):1371-5.
6. Hensey C, Sett A, Connell T, et al. Missed opportunities for outpatient parenteral antibiotic therapy for bacterial meningitis and pyelonephritis in children. Australasian Hospital-in-the-Home Society Annual Conference. Melbourne, 2014.
7. Caplan GA, Sulaiman NS, Mangin DA, et al. A meta-analysis of "hospital in the home". *Med J Aust* 2012;197(9):512-9.
8. Ibrahim LF, Hopper SM, Babl FE, et al. Who Can Have Parenteral Antibiotics at Home?: A Prospective Observational Study in Children with Moderate/Severe

- 1  
2  
3 Cellulitis. *Pediatr Infect Dis J* 2016;35(3):269-74. doi:  
4  
5 10.1097/INF.0000000000000992  
6  
7
- 8 9. Raisch DW, Holdsworth MT, Winter SS, et al. Economic comparison of home-care-  
9  
10 based versus hospital-based treatment of chemotherapy-induced febrile  
11  
12 neutropenia in children. *Value in Health* 2003;6(2):158-66.  
13  
14
- 15 10. Hodgson KA, Huynh J, Ibrahim LF, et al. The use, appropriateness and outcomes of  
16  
17 outpatient parenteral antimicrobial therapy. *Arch Dis Child* 2016;101(10):886-  
18  
19 93. doi: 10.1136/archdischild-2015-309731  
20  
21
- 22 11. Scanlan BT, Ibrahim LF, Hopper SM, et al. Selected Children With Complicated  
23  
24 Acute Urinary Tract Infection May Be Treated With Outpatient Parenteral  
25  
26 Antibiotic Therapy at Home Directly From the Emergency Department. *Pediatr*  
27  
28 *Infect Dis J* 2019;38(2):e20-e25. doi: 10.1097/INF.0000000000002070  
29  
30 [published Online First: 2018/04/11]  
31  
32
- 33 12. Manhas KP, Mitchell I. Children with complex care needs going home: The  
34  
35 relevance of ethical ideas of proximity. *Paediatr Child Health* 2009;14(6):369-  
36  
37 70.  
38  
39
- 40 13. Simonds AK. Respiratory support for the severely handicapped child with  
41  
42 neuromuscular disease: ethics and practicality. *Semin Respir Crit Care Med*  
43  
44 2007;28(3):342-54. doi: 10.1055/s-2007-981655  
45  
46
- 47 14. Anonymous. World Medical Association International Code of Medical Ethics:  
48  
49 World Medical Association, 2006.  
50  
51
- 52 15. Anonymous. Code of Ethics of the Canadian Medical Association: Canadian  
53  
54 Medical Association, 1996.  
55  
56
- 57 16. Anonymous. American Medical Association Code of Medical Ethics - updated  
58  
59 2016: American Medical Association, 2001.  
60

- 1  
2  
3 17. Anonymous. Australian Medical Association Code of Ethics: Australian Medical  
4  
5 Association, 2006.  
6  
7  
8 18. Anonymous. Good Medical Practice: General Medical Council UK, 2014.  
9  
10 19. Beauchamp TL, Childress J. Principles of biomedical ethics. New York: Oxford  
11  
12 University Press 2009.  
13  
14 20. Carrese JA. Refusal of care: patients' well-being and physicians' ethical  
15  
16 obligations: "but doctor, I want to go home". *JAMA* 2006;296(6):691-5. doi:  
17  
18 10.1001/jama.296.6.691  
19  
20 21. DeWolf Bosek MS, Cashman GS. Ethical obligations and concerns when trying to  
21  
22 achieve a patient's wishes: ethics consultation. *JONAS Healthc Law Ethics Regul*  
23  
24 2008;10(3):76-7. doi: 10.1097/01.NHL.0000300790.90014.d6  
25  
26 22. Nutting PA, Miller WL, Crabtree BF, et al. Initial lessons from the first national  
27  
28 demonstration project on practice transformation to a patient-centered  
29  
30 medical home. *Ann Fam Med* 2009;7(3):254-60. doi: 10.1370/afm.1002  
31  
32  
33 23. Boyce SL, Ibrahim LF, Connell T, et al. How many children who could be cared for  
34  
35 at home are being missed and why? Australasian Hospital-in-the-Home  
36  
37 Society Annual Conference. Melbourne, 2014.  
38  
39  
40 24. Ibrahim LF, Hopper SM, Orsini F, et al. Efficacy and safety of intravenous  
41  
42 ceftriaxone at home versus intravenous flucloxacillin in hospital for children  
43  
44 with cellulitis (CHOICE): a single-centre, open-label, randomised, controlled,  
45  
46 non-inferiority trial. *The Lancet Infectious diseases* 2019;19(5):477-86. doi:  
47  
48 10.1016/S1473-3099(18)30729-1 [published Online First: 2019/03/12]  
49  
50  
51 25. Ibrahim LF, Huang L, Hopper SM, et al. Intravenous ceftriaxone at home versus  
52  
53 intravenous flucloxacillin in hospital for children with cellulitis: a cost-  
54  
55  
56  
57  
58  
59  
60

effectiveness analysis. *The Lancet Infectious diseases* 2019 doi:  
10.1016/S1473-3099(19)30288-9 [published Online First: 2019/08/20]

26. Ibrahim LF, Babl FE, Orsini F, et al. Cellulitis: Home Or Inpatient in Children from  
the Emergency Department (CHOICE): protocol for a randomised controlled  
trial. *BMJ open* 2016;6(1):e009606. doi: 10.1136/bmjopen-2015-009606

27. Wynia MK, Sabin JE. Ethical challenges come home. *J Gen Intern Med*  
2013;28(1):9-11. doi: 10.1007/s11606-012-2232-0

Confidential: For Review Only

## Tables

Table 1. Responses to ethical questions (see text for full questions)

| Question                     | Responses<br>No. (%) | Vote results       |                        |
|------------------------------|----------------------|--------------------|------------------------|
|                              |                      | Ethical<br>No. (%) | Not ethical<br>No. (%) |
| 1. Home treatment            | 80 (100)             | 77 (96)            | 3 (4)                  |
| 2. Domestic violence         | 63 (79)              | 37 (59)            | 26 (41)                |
| 3. Parental respite          |                      |                    |                        |
| a. Maternal exhaustion       | 67 (84)              | 28 (42)            | 39 (58)                |
| b. Afford a family holiday   | 57 (71)              | 28 (49)            | 29 (51)                |
| c. Afford a wheelchair       | 64 (80)              | 28 (44)            | 36 (56)                |
| 4. Consent                   |                      |                    |                        |
| a. 14 years old              | 63 (79)              | 33 (52)            | 30 (48)                |
| b. 16 years old              | 58 (73)              | 48 (83)            | 10 (17)                |
| 5. Physiotherapy unavailable | 61 (76)              | 10 (16)            | 51 (84)                |
| 6. Bedroom sanctuary         | 64 (80)              | 63 (98)            | 1 (2)                  |
| 7. Intramuscular injections  |                      |                    |                        |
| a. 1 day                     | 62 (78)              | 61 (98)            | 1 (2)                  |
| b. 2 days                    | 59 (74)              | 52 (88)            | 7 (12)                 |
| c. 3 days                    | 60 (75)              | 31 (52)            | 29 (48)                |

**Figure legends**

Figure 1. Proportion of participants who believe it is ethical to administer intramuscular (IM) injections at home by number of days

Confidential: For Review Only

1  
2  
3  
4  
5  
6  
7  
8  
9  
10  
11  
12  
13  
14  
15  
16  
17  
18  
19  
20  
21  
22  
23  
24  
25  
26  
27  
28  
29  
30  
31  
32  
33  
34  
35  
36  
37  
38  
39  
40  
41  
42  
43  
44  
45  
46  
47  
48  
49  
50  
51  
52  
53  
54  
55  
56  
57  
58  
59  
60

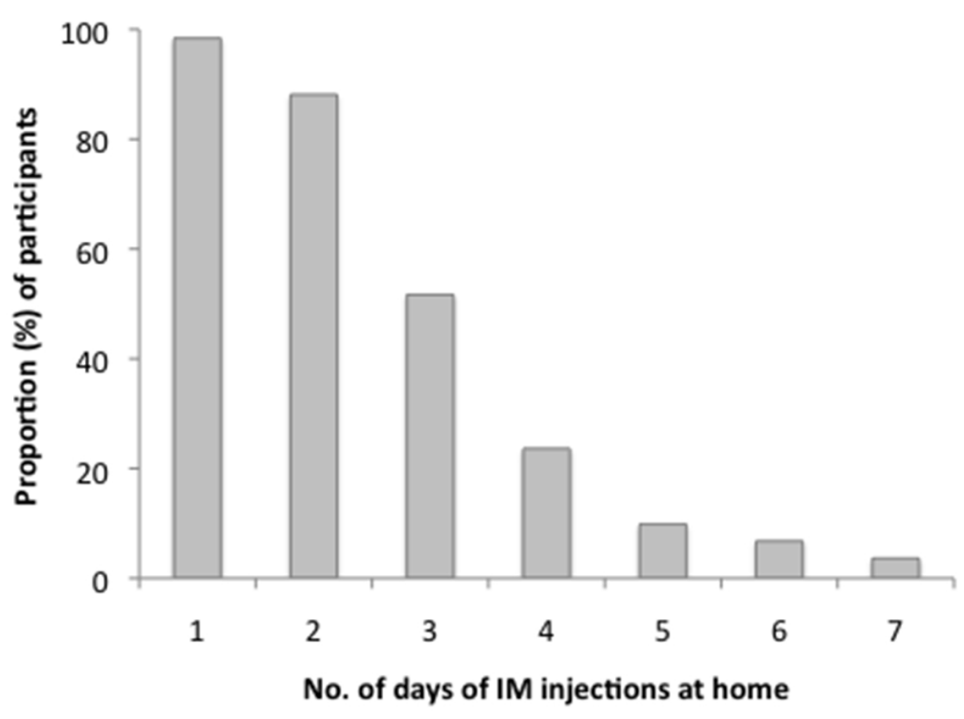

# BMJ Paediatrics Open

## Ethical dilemmas in providing acute medical care at home for children: a survey of health professionals

|                               |                                                                                               |
|-------------------------------|-----------------------------------------------------------------------------------------------|
| Journal:                      | <i>BMJ Paediatrics Open</i>                                                                   |
| Manuscript ID                 | bmjpo-2019-000590.R1                                                                          |
| Article Type:                 | Original research                                                                             |
| Date Submitted by the Author: | 29-Dec-2019                                                                                   |
| Complete List of Authors:     | Bryant, Penelope; The Royal Children's Hospital, General Medicine                             |
| Keywords:                     | Ethics, Adolescent Health, General Paediatrics, Health services research, Infectious Diseases |
|                               |                                                                                               |

SCHOLARONE™  
Manuscripts



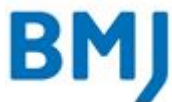

I, the Submitting Author has the right to grant and does grant on behalf of all authors of the Work (as defined in the below author licence), an exclusive licence and/or a non-exclusive licence for contributions from authors who are: i) UK Crown employees; ii) where BMJ has agreed a CC-BY licence shall apply, and/or iii) in accordance with the terms applicable for US Federal Government officers or employees acting as part of their official duties; on a worldwide, perpetual, irrevocable, royalty-free basis to BMJ Publishing Group Ltd ("BMJ") its licensees and where the relevant Journal is co-owned by BMJ to the co-owners of the Journal, to publish the Work in this journal and any other BMJ products and to exploit all rights, as set out in our [licence](#).

The Submitting Author accepts and understands that any supply made under these terms is made by BMJ to the Submitting Author unless you are acting as an employee on behalf of your employer or a postgraduate student of an affiliated institution which is paying any applicable article publishing charge ("APC") for Open Access articles. Where the Submitting Author wishes to make the Work available on an Open Access basis (and intends to pay the relevant APC), the terms of reuse of such Open Access shall be governed by a Creative Commons licence – details of these licences and which [Creative Commons](#) licence will apply to this Work are set out in our licence referred to above.

Other than as permitted in any relevant BMJ Author's Self Archiving Policies, I confirm this Work has not been accepted for publication elsewhere, is not being considered for publication elsewhere and does not duplicate material already published. I confirm all authors consent to publication of this Work and authorise the granting of this licence.

1  
2  
3 **Ethical dilemmas in providing acute medical care at home for children: a survey**  
4  
5 **of health professionals**  
6  
7  
8  
9

10 Penelope A. Bryant, PhD<sup>1,2,3,4</sup>  
11  
12  
13

14 1 Hospital-in-the-Home Department  
15

16 2 Infectious Diseases Unit, Department of General Medicine  
17

18 3 Clinical Paediatrics Group, Murdoch Children's Research Institute  
19

20 4 Department of Paediatrics, University of Melbourne  
21

22 all at: The Royal Children's Hospital Melbourne, Australia  
23  
24  
25  
26  
27  
28

29 **Abstract word count:** 250  
30

31 **Manuscript word count:** 2,499  
32

33 **Keywords:** Hospital-in-the-Home, Hospital-at-Home, Medical Home, Outpatient  
34

35 Parenteral Antibiotic Therapy, Ethics  
36  
37  
38  
39  
40

41 **Corresponding author:**  
42

43 A/Prof Penelope Bryant  
44

45 Hospital-in-the-Home Department  
46

47 The Royal Children's Hospital Melbourne  
48

49 Parkville, VIC 3052  
50

51 Australia  
52

53 Ph: +61393455522  
54

55 Email: penelope.bryant@rch.org.au  
56  
57  
58  
59  
60

## ABSTRACT

**Objective:** Acute care at home is increasing. We aimed to determine the views of healthcare professionals on the ethics of providing home care and compare the impact of situational changes on their opinions.

**Design:** An analysis of opinions of home healthcare professionals.

**Setting:** The Australasian Hospital-in-the-Home Annual Conference, November 2017.

**Participants:** Eighty physicians, nurses and allied health staff who provide acute care for children and adults at home.

**Methods:** Clinical scenarios were presented about a 14-year-old receiving intravenous antibiotics at home via an established home care pathway, and participants were asked to vote manually on whether providing home care was ethical.

**Main Outcomes:** The proportions of healthcare professionals who believed that provision of home care was ethical in different situations.

**Results:** For each question the response rate ranged from 71-100%. While the provision of acute home care was deemed ethical by the majority (77/80, 96%), this decreased when other factors were involved such as domestic violence (37/63 (59%) OR 0.06 95%CI 0.02-0.20,  $p < 0.001$ ) and, parental reluctance (28/67 (42%) OR 0.02 95%CI 0.008-0.09,  $p < 0.001$ ). The age of consent affected the proportion who considered home care ethical against parental wishes: 16 years versus 14 years: OR 4.4 95% CI 1.9-10.1,  $p < 0.001$ . The lowest proportion to consider home care ethical (16%) was when home care was deemed less than hospital care.

**Conclusions:** Home healthcare providers are supportive of the ethics of providing acute care at home for children, although differ amongst themselves with situational complexities. Applying the tenets of medical ethics (autonomy, non-maleficence,

1  
2  
3 beneficence and justice) can provide insights into the factors that may influence  
4  
5  
6 opinions.  
7  
8  
9  
10  
11  
12  
13  
14  
15  
16  
17  
18  
19  
20  
21  
22  
23  
24  
25  
26  
27  
28  
29  
30  
31  
32  
33  
34  
35  
36  
37  
38  
39  
40  
41  
42  
43  
44  
45  
46  
47  
48  
49  
50  
51  
52  
53  
54  
55  
56  
57  
58  
59  
60

Confidential: For Review Only

## INTRODUCTION

Care at home for acute medical conditions is increasingly viewed and used as a viable alternative to hospital admission<sup>1 2</sup>. The rationale applies to both patients and organisations. The majority of patients prefer to receive their care at home if possible, and have improved psychological outcomes and reduced risks associated with admission such as hospital-acquired infections<sup>3 4</sup>. For organisations, improved flow of patients and reduced costs make home care attractive<sup>5 6</sup>. There is evidence in adults that safety and efficacy are comparable between home and hospital care in selected patients and conditions<sup>7</sup>. While the evidence for safety and efficacy in acute conditions is scarcer in children, this too is accumulating<sup>8-11</sup>. However, while there is some literature around the ethics of treating children with chronic conditions at home<sup>12 13</sup>, the ethical aspects of treating children at home for acute conditions have not previously been explored.

Ethical behaviour has been considered in medicine since Hippocrates, and the International Code of Medical Ethics<sup>14</sup>, or variants, have been adopted by many national medical associations<sup>15-18</sup>. These are based on the four principles of medical ethics described by Beauchamp and Childress: autonomy, non-maleficence, beneficence and justice<sup>19</sup>.

We aimed to understand the views of clinical professionals who provide home care on various ethical aspects of managing children with acute medical conditions at home that would otherwise necessitate hospital admission. Acute home programs have names including hospital-in-the-home and medical home, whereby nursing, medical and allied health staff provide at least daily medical interventions in the

1  
2  
3 home including intravenous antibiotics, acute wound dressings, chemotherapy, and  
4  
5 physiotherapy. We aimed to determine the ethical parameters within which home  
6  
7 healthcare professionals believe they should be providing care to children at home.  
8  
9

## 10 11 12 **METHODS**

13  
14  
15 **Setting:** The Australasian Hospital-in-the-Home (HITH) Annual Conference  
16  
17 November 2017.

18  
19  
20 **Participants:** Medical, nursing and allied health staff attendees to the conference, all  
21  
22 of whom provide clinical services to patients at home.

23  
24  
25 **Design:** All attendees were invited to a session titled 'Ethical dilemmas in HITH  
26  
27 practice'. The intention to survey opinions on ethical matters was explained and  
28  
29 attendees were invited to leave the session if they wished, or stay and participate or  
30  
31 not as they wished. Nobody left but four attendees declined to participate.

32  
33 Background was given on how ethical constructs can be used to explore practical  
34  
35 dilemmas. A non-clinical scenario was given to show there is often no right answer,  
36  
37 how ethical reasoning can be applied to either side of an argument, and that  
38  
39 increasing or changing available information can change how a situation is viewed  
40  
41 ethically. It was explained that several questions would be asked for which there was  
42  
43 no right answer and that the information they needed to make a fully informed  
44  
45 decision may not be there. For each question, participants could choose to vote or not,  
46  
47 and they were requested to hold up a blue sign if they thought the situation was  
48  
49 ethical and a red one if they thought not. To try to mitigate any feeling of peer  
50  
51 pressure to vote in a certain way, the signs were white on the back so the choice of  
52  
53 response was only visible from the front with all participants facing forward. Two  
54  
55 people counted votes and in case of discrepancy, a photograph was taken and  
56  
57  
58  
59  
60

1  
2  
3 attendees were assured these would be destroyed after verification. The session used a  
4  
5 fictitious situation based on real dilemmas that arise in acute home care.  
6  
7

8 **Main Outcomes:** The proportion of healthcare professionals who believed that  
9  
10 provision of home care was ethical in different situations.  
11

12 **Statistical analysis:** Chi-square test was used to compare the proportion of  
13  
14 responses to different situational questions, with odds ratios (OR), 95% confidence  
15  
16 intervals (CI), and  $p < 0.05$  considered significant.  
17  
18

19 **Patient and public involvement:** There were no patients or members of the public  
20  
21 involved in any aspect of the study as it is an examination of opinions of clinical staff.  
22  
23

24 **Ethics approval:** This was not required due to the opinions belonging to the  
25  
26 healthcare staff and not associated with healthcare institutions and not involving  
27  
28 clinical care. The purpose of the session was clearly set out prior to starting and  
29  
30 participants were offered the opportunity to leave, or stay but not participate without  
31  
32 having to declare their non-participation. All data were anonymised and collated and  
33  
34 presented in aggregate.  
35  
36  
37  
38  
39

## 40 **RESULTS**

41  
42 The participants at the Australasian Hospital-in-the-Home Society Annual Conference  
43  
44 were predominantly from Australia and New Zealand and between the ages of 25 and  
45  
46 65 years. Their professional background was all in healthcare and all in home care,  
47  
48 with 70% nursing, 20% allied health (predominantly physiotherapists) and 10%  
49  
50 medical. A minority (5-10%) were directly involved in paediatric home care. Two  
51  
52 test questions ascertained the maximum number of voting participants and ensured  
53  
54 an understanding of the process – the first aiming to elicit an ‘ethical’ response and  
55  
56 the second a ‘not ethical’ response. 80/84 (95%) attendees participated, all of whom  
57  
58  
59  
60

1  
2  
3 voted 'ethical' for the first question and 'not ethical' for the second question. For the  
4  
5 clinical scenario, after each piece of additional information, participants were asked  
6  
7 to vote on 'Is it ethical to provide a home service for this patient in this situation?'

8  
9  
10 Response rates for each question ranged from 71-100%.

11  
12  
13  
14  
15 *Question 1. A 14-year-old girl with cystic fibrosis (CF) needs a planned episode of care*  
16  
17 *for an infective exacerbation. Your institution has a well-established home care*  
18  
19 *pathway for 'CF tune-ups' for adolescents with intravenous antibiotics and*  
20  
21 *physiotherapy. You offer her this home care pathway or hospital care and she chooses*  
22  
23 *home.*

24  
25  
26 Home care was voted as ethical by a very high proportion of participants (77 votes,  
27  
28 96%), all of whom work in home care and are therefore familiar with it (table 1).

29  
30  
31  
32  
33 *Question 2. You discover that there is a history of domestic violence between adults in*  
34  
35 *the household.*

36  
37  
38 Compared to the previous response, the proportion (37/63, 59%) who thought  
39  
40 providing a home service was ethical when domestic violence was involved was  
41  
42 significantly decreased (OR 0.06 95%CI 0.02-0.20,  $p < 0.001$ ).

43  
44  
45  
46  
47 *Question 3a. You determine there is no current risk to nursing staff. However, the girl's*  
48  
49 *mother tells you she is exhausted from chronic care of her child and was counting on*  
50  
51 *hospital admission for respite.*

52  
53  
54  
55 *3b. Her mother tells you if she doesn't get this respite, she will have to take unpaid leave*  
56  
57 *and won't be able to afford to take everyone on a family holiday.*



1  
2  
3 *3c. Her mother tells you if she doesn't get this respite, she will have to take unpaid leave*  
4 *and won't be able to afford to buy a wheelchair for her other child who has a disability.*

5  
6  
7  
8 Compared to the first response, the proportion (28/67, 42%) who thought providing  
9  
10 home care was ethical when the mother declared her reluctance due to exhaustion  
11  
12 was significantly decreased (OR 0.02 95%CI 0.008-0.09,  $p < 0.001$ ). Different reasons  
13  
14 for the respite request did not significantly affect the opinion on whether the care  
15  
16 was ethical compared to maternal exhaustion: to afford a family holiday: 49% versus  
17  
18 42%, OR 1.3 95%CI 0.7-2.7,  $p = 0.3$ ), or to buy a wheelchair: 44% versus 42%, OR 1.1  
19  
20 95%CI 0.5-2.1,  $p = 0.5$ ). Whether it was ethical to care for a child at home when the  
21  
22 request for respite hospitalisation was to pay for a family holiday had the lowest  
23  
24 response rate for all questions (71%).  
25  
26  
27  
28  
29  
30

31 *Question 4a. You are about to acquiesce to parental wishes, but the 14-year-old girl now*  
32 *insists that she wants to go home via HITH.*

33  
34  
35  
36 *4b. What if the girl was 16 years old?*

37  
38 There was a significant difference with patient age (without any further information)  
39  
40 about whether it was deemed ethical to provide home care per the patient's wishes  
41  
42 against parental wishes: 48/58 (83%) at 16 years versus 33/63 (52%) at 14 years  
43  
44 (OR 4.4 95% CI 1.9-10.1,  $p < 0.001$ ).  
45  
46  
47  
48  
49

50 *Question 5. Everyone now agrees to proceed with treatment at home. However, the*  
51 *home care physiotherapist will be away during the treatment period, so the girl and her*  
52 *parents will need to do her physiotherapy.*  
53  
54  
55  
56  
57  
58  
59  
60

1  
2  
3 Compared to the first response, the unavailability of physiotherapy led to the lowest  
4 proportion (10/61, 16%) of all questions of those who felt providing home care in  
5 this scenario was ethical (OR 0.008 95%CI 0.002-0.03,  $p<0.001$ ).  
6  
7  
8  
9

10  
11  
12 *Question 6. Your first visit to the home reveals a small apartment where the young girl's*  
13 *bedroom is her only sanctuary. This is currently full of medical equipment to facilitate*  
14 *her being at home.*  
15  
16  
17  
18

19 A high proportion of participants (63/64, 98%) voted that providing home care in  
20 this situation was ethical, with no difference from the original scenario (OR 2.5  
21 95%CI 0.2-24.1,  $p=0.4$ ).  
22  
23  
24  
25  
26  
27  
28

29 *Question 7a. Towards the end of her HITH stay her peripherally-inserted central*  
30 *catheter (PICC) blocks and you are unable to insert a cannula despite repeated*  
31 *attempts. The options are intramuscular injection or reinsertion of the PICC, for which*  
32 *she would need admission for a general anaesthetic. You decide to give an*  
33 *intramuscular injection so she can continue at home as she only needs one more day of*  
34 *parenteral antibiotics.*  
35  
36  
37  
38  
39  
40  
41  
42

43 *7b. Two days of intramuscular injections.*

44 *7c. Three days of intramuscular injections.*

45  
46  
47 As the number of days of intramuscular injections at home in preference to admission  
48 for PICC replacement increased, the proportion of participants that felt this was  
49 ethical fell significantly (figure 1): 61/62 (98%) versus 31/60 (52%), OR 57 95%CI 7-  
50 439,  $p<0.001$ ).  
51  
52  
53  
54  
55  
56  
57  
58

## 59 **DISCUSSION**

60

1  
2  
3 This is the first examination of the application of ethical values to acute care for  
4 patients at home. The responses are those of health professionals who are all engaged  
5 in home healthcare, predominantly in adults. The questions were designed to test  
6 various aspects of the four tenets of medical ethics.  
7  
8  
9  
10  
11

12  
13  
14 Patient autonomy refers to respectful treatment of patients by ensuring disclosure of  
15 information and not constraining their right to make their own informed decision.  
16 This is exemplified in the first question where information is given to the patient and  
17 she decides between home care and hospital admission. The strong vote that this was  
18 ethical indicates that participants feel there is sufficient evidence that home care is  
19 effective and safe. Insufficient information is given to assess whether there was  
20 patient coercion, which is prohibited by the concept of autonomy, but on the face of it,  
21 the process appears ethical. The decision becomes less clear, as highlighted by the  
22 drop in 'ethical' votes, when the patient's mother's autonomy is included. This  
23 question also raised whether different reasons underpinning her autonomy  
24 (exhaustion, lack of funds) affect the ethical construct, but these were not viewed by  
25 participants as having as much impact as the mere fact of her opposing decision. In  
26 adult medicine, the patient's autonomy is paramount with the wishes of spouses and  
27 children being secondary<sup>20 21</sup>. In paediatrics, autonomy regarding medical care lies  
28 with those (usually the parent/s) holding parental rights, but the age at which the  
29 child's best interests are served by the child being autonomous is debated. More  
30 participants felt it was ethical for a 16-year-old to provide consent than a 14-year-old  
31 and this may reflect some lack of familiarity with the care of younger mature  
32 adolescents. The age at which a child can legally provide consent is different in  
33 different countries. In the UK, the test of 'Gillick competence' allows a minor under  
34  
35  
36  
37  
38  
39  
40  
41  
42  
43  
44  
45  
46  
47  
48  
49  
50  
51  
52  
53  
54  
55  
56  
57  
58  
59  
60

1  
2  
3 the legal age of consent (16 years) to be assessed as sufficiently mature to understand  
4 and make their own decisions and provide consent. This is in line with the ethical  
5  
6 tenet of autonomy, which relies on competence. This medical case law has essentially  
7  
8 been adopted in Australia and Canada, although only sporadically in the USA.  
9  
10  
11 However, even if consent is given by the adolescent, each home care service may have  
12  
13 its own rules about whether an adult also needs to be present, which may supersede  
14  
15 the ethical aspects of who ultimately provides consent.  
16  
17  
18  
19  
20  
21

22 Non-maleficence refers to the duty to avoid causing harm including pain, suffering  
23  
24 and disablement. Beneficence refers to the duty to actively promote good for patients,  
25  
26 to defend their rights and to remove conditions that will cause harm. Although, they  
27  
28 are sometimes seen as two sides of the same coin, one can obey the dictates of non-  
29  
30 maleficence simply by refraining from acting, but beneficence requires positive  
31  
32 action. Several questions highlighted these dual tenets, essentially creating an ethical  
33  
34 dilemma, including provision of potentially invasive services in her place of  
35  
36 sanctuary: beneficence of active care provision for her health, but non-maleficence  
37  
38 requires not to the detriment to her psyche. However, as long as the patient is fully  
39  
40 informed and has consented, autonomy dictates that we should not be paternalistic.  
41  
42  
43 Any detrimental effects may also differ between short episodes of acute care and  
44  
45 ongoing chronic care where medical equipment might be a permanent fixture. The  
46  
47 benefits and harms are also raised in the question on intramuscular injections, with  
48  
49 increasing number (and therefore pain) correlating with decreasing acceptance. This  
50  
51 adds a level of complexity when deciding on the ethical imperatives between the  
52  
53 three options of home care, intramuscular injections and the small but serious  
54  
55 potential harm of a general anaesthetic.  
56  
57  
58  
59  
60

1  
2  
3  
4  
5  
6 The issue of household domestic violence raises to whom the beneficence and non-  
7  
8 maleficence need to be applied. In this situation there is an obligation of specific  
9  
10 beneficence to the patient, and it potentially even increases the imperative for a  
11  
12 professional to visit the home. However, the ethical balance shifted for non-  
13  
14 responders when non-maleficence needed to be considered for a staff member  
15  
16 entering a potentially unsafe situation. Since there is a moral obligation to both, other  
17  
18 aspects should be considered to guide decision-making such as the vulnerability of  
19  
20 the individual and the risk of potential harm to either party, and for that more  
21  
22 information is required. It is, however, worth stating that it is rare for domestic  
23  
24 violence to be perpetrated against outsiders, and that the balance of most home  
25  
26 healthcare providers is to provide the care and, if necessary, have two staff members  
27  
28 visit together.  
29  
30  
31  
32  
33  
34  
35

36 Finally, justice refers to how benefits and burdens should be distributed. It mandates  
37  
38 the fair medical treatment of patients, with equal situations being treated equally, and  
39  
40 unequal situations being treated in proportion to their inequalities. A large majority  
41  
42 of participants felt it was not just to provide inferior treatment at home compared to  
43  
44 what would be offered in hospital, reflecting the importance of physiotherapy in CF  
45  
46 care. This is important because the concern around home care being inferior is a  
47  
48 barrier to acute home care for many institutions and clinical staff<sup>22 23</sup>. Robust  
49  
50 evidence that home care is as efficacious and safe as hospital care for children is  
51  
52 increasing, but more is needed<sup>24</sup>. Of note, most home programs only provide daily  
53  
54 physiotherapy at home compared to twice daily in hospital, which is therefore  
55  
56 already less, yet this is considered acceptable by respiratory physicians. The concept  
57  
58  
59  
60

1  
2  
3 of 'good enough' has been discussed regarding parenting where perfection is not  
4 deemed necessary. It may be appropriate to apply the same concept to home services  
5 where the intensity of services is lower, but the quality must be as high. We did not  
6 explore how good would be considered 'good enough' (eg physiotherapy via  
7 telehealth, a physiotherapist visiting alternate days) or compare this with the risks of  
8 inpatient admission. The other aspect is the balance of unequal situations. In a recent  
9 study of home intravenous antibiotic treatment for cellulitis, it was shown that parent  
10 and child quality of life was significantly higher at home and it cost three times less  
11 for the family than in hospital<sup>24 25</sup>. The efficacy level (the primary outcome) for non-  
12 inferiority was set lower for home than in hospital at the start of the trial<sup>26</sup> because of  
13 the recognition of the benefits of home and acceptance of a proportionally lower level  
14 of efficacy, although efficacy was actually found to be higher at home. Unequal  
15 situations were tested in the question around maternal reasons for wanting her  
16 daughter to have a hospital admission. That the lowest response rate was recorded  
17 for whether saving for a family holiday was an ethical reason for not wanting  
18 homecare may reflect the lack of paediatric healthcare professionals in the audience,  
19 as in paediatrics the child is considered within the holistic sphere of the family, and  
20 family well-being is considered an important component .

21  
22  
23  
24  
25  
26  
27  
28  
29  
30  
31  
32  
33  
34  
35  
36  
37  
38  
39  
40  
41  
42  
43  
44  
45  
46  
47  
48 Study limitations are that it only evaluated opinions of those providing home  
49 services. The majority predominantly provide care to adult patients, so would be less  
50 familiar with considering ethical aspects of paediatric care at home. The patient was  
51 chosen as an adolescent for this reason, but the answers around age of consent and  
52 parental respite may have been answered differently by hospital paediatricians and  
53 other healthcare providers. Additionally, because it was not completely anonymous  
54  
55  
56  
57  
58  
59  
60

1  
2  
3 (the technology was unavailable for electronic voting) people may have felt peer  
4 pressure to vote similarly. The mitigation for this was that the which way people  
5 voted (red or blue colour of vote) were only visible from the front and the  
6 participants were all facing forward. Additionally, the differences in proportions of  
7 votes for different questions suggest that this factor was not strong. One other  
8 limitation is that questions were limited to clinical dilemmas, and did not include  
9 other ethical dimensions to acute home care such as organisational issues (eg  
10 rationing or payment of services<sup>27</sup>) and research.  
11  
12  
13  
14  
15  
16  
17  
18  
19  
20  
21  
22  
23

24 The tenets of medical ethics do not aim to provide answers, or even guidelines, for  
25 managing moral issues; rather they provide a framework to identify and reflect upon  
26 them. These results can provide a benchmark against which surveys of other groups  
27 regarding acute home care in children can be compared. The next important step will  
28 be to obtain the opinions of patients, families and other healthcare providers. The  
29 results show the relevance of considering ethical aspects of the provision of home  
30 care, both in building a service and in providing and constantly improving the quality  
31 of delivering acute medical care to children at home.  
32  
33  
34  
35  
36  
37  
38  
39  
40  
41  
42  
43  
44

### 45 **Acknowledgements**

46 Thanks to those who participated in the survey. A/Prof Bryant is in receipt of a  
47 Clinician Scientist Fellowship from the Murdoch Children's Research Institute, which  
48 had no role in any aspect of the study.  
49  
50  
51  
52  
53  
54  
55  
56

57 **Conflicts of interest:** This study was not funded and there are no conflicts of interest  
58 to declare.  
59  
60

1  
2  
3  
4  
5  
6  
7  
8  
9  
10  
11  
12  
13  
14  
15  
16  
17  
18  
19  
20  
21  
22  
23  
24  
25  
26  
27  
28  
29  
30  
31  
32  
33  
34  
35  
36  
37  
38  
39  
40  
41  
42  
43  
44  
45  
46  
47  
48  
49  
50  
51  
52  
53  
54  
55  
56  
57  
58  
59  
60

Confidential: For Review Only



### What is already known on this topic

- Children are increasingly managed at home for treatment of acute conditions that would traditionally require hospital admission
- There is emerging evidence for the efficacy and safety of this approach, but a lack of discussion on the ethical aspects.

### What this study adds

- Healthcare providers who are familiar with acute home care believe this care follows the ethical tenets of autonomy, beneficence, non-maleficence and justice.
- Ethical dilemmas arise when other people such as staff members and parents need to be considered.
- Provision of home care was felt to be least ethical when it was deemed inferior clinically to hospital care.

## References

1. Bryant PA, Hopper SM. Alternatives to ward admission from the emergency department. *J Paediatr Child Health* 2016;52(2):237-40. doi: 10.1111/jpc.13100 [published Online First: 2016/04/12]
2. Sartain SA, Maxwell MJ, Todd PJ, et al. Users' views on hospital and home care for acute illness in childhood. *Health & social care in the community* 2001;9(2):108-17.
3. Ibrahim LF, Hopper SM, Connell TG, et al. Evaluating an admission avoidance pathway for children in the emergency department: outpatient intravenous antibiotics for moderate/severe cellulitis. *Emerg Med J* 2017;34(12):780-85. doi: 10.1136/emermed-2017-206829 [published Online First: 2017/10/06]
4. Strandvik B, Hjelte L, Malmborg AS, et al. Home intravenous antibiotic treatment of patients with cystic fibrosis. *Acta Paediatr* 1992;81(4):340-4. doi: 10.1111/j.1651-2227.1992.tb12239.x [published Online First: 1992/04/01]
5. Warner BW, Kulick RM, Stoops MM, et al. An evidenced-based clinical pathway for acute appendicitis decreases hospital duration and cost. *Journal of Pediatric Surgery* 1998;33(9):1371-5.
6. Hensey C, Sett A, Connell T, et al. Missed opportunities for outpatient parenteral antibiotic therapy for bacterial meningitis and pyelonephritis in children. Australasian Hospital-in-the-Home Society Annual Conference. Melbourne, 2014.
7. Caplan GA, Sulaiman NS, Mangin DA, et al. A meta-analysis of "hospital in the home". *Med J Aust* 2012;197(9):512-9.
8. Ibrahim LF, Hopper SM, Babl FE, et al. Who Can Have Parenteral Antibiotics at Home?: A Prospective Observational Study in Children with Moderate/Severe

- 1  
2  
3 Cellulitis. *Pediatr Infect Dis J* 2016;35(3):269-74. doi:  
4  
5 10.1097/INF.0000000000000992  
6  
7
- 8 9. Raisch DW, Holdsworth MT, Winter SS, et al. Economic comparison of home-care-  
9  
10 based versus hospital-based treatment of chemotherapy-induced febrile  
11  
12 neutropenia in children. *Value in Health* 2003;6(2):158-66.  
13  
14
- 15 10. Hodgson KA, Huynh J, Ibrahim LF, et al. The use, appropriateness and outcomes of  
16  
17 outpatient parenteral antimicrobial therapy. *Arch Dis Child* 2016;101(10):886-  
18  
19 93. doi: 10.1136/archdischild-2015-309731  
20  
21
- 22 11. Scanlan BT, Ibrahim LF, Hopper SM, et al. Selected Children With Complicated  
23  
24 Acute Urinary Tract Infection May Be Treated With Outpatient Parenteral  
25  
26 Antibiotic Therapy at Home Directly From the Emergency Department. *Pediatr*  
27  
28 *Infect Dis J* 2019;38(2):e20-e25. doi: 10.1097/INF.0000000000002070  
29  
30 [published Online First: 2018/04/11]  
31  
32
- 33 12. Manhas KP, Mitchell I. Children with complex care needs going home: The  
34  
35 relevance of ethical ideas of proximity. *Paediatr Child Health* 2009;14(6):369-  
36  
37 70.  
38  
39
- 40 13. Simonds AK. Respiratory support for the severely handicapped child with  
41  
42 neuromuscular disease: ethics and practicality. *Semin Respir Crit Care Med*  
43  
44 2007;28(3):342-54. doi: 10.1055/s-2007-981655  
45  
46
- 47 14. Anonymous. World Medical Association International Code of Medical Ethics:  
48  
49 World Medical Association, 2006.  
50  
51
- 52 15. Anonymous. Code of Ethics of the Canadian Medical Association: Canadian  
53  
54 Medical Association, 1996.  
55  
56
- 57 16. Anonymous. American Medical Association Code of Medical Ethics - updated  
58  
59 2016: American Medical Association, 2001.  
60

- 1  
2  
3 17. Anonymous. Australian Medical Association Code of Ethics: Australian Medical  
4  
5 Association, 2006.  
6  
7
- 8 18. Anonymous. Good Medical Practice: General Medical Council UK, 2014.  
9
- 10 19. Beauchamp TL, Childress J. Principles of biomedical ethics. New York: Oxford  
11  
12 University Press 2009.  
13
- 14 20. Carrese JA. Refusal of care: patients' well-being and physicians' ethical  
15  
16 obligations: "but doctor, I want to go home". *JAMA* 2006;296(6):691-5. doi:  
17  
18 10.1001/jama.296.6.691  
19
- 20 21. DeWolf Bosek MS, Cashman GS. Ethical obligations and concerns when trying to  
21  
22 achieve a patient's wishes: ethics consultation. *JONAS Healthc Law Ethics Regul*  
23  
24 2008;10(3):76-7. doi: 10.1097/01.NHL.0000300790.90014.d6  
25  
26
- 27 22. Nutting PA, Miller WL, Crabtree BF, et al. Initial lessons from the first national  
28  
29 demonstration project on practice transformation to a patient-centered  
30  
31 medical home. *Ann Fam Med* 2009;7(3):254-60. doi: 10.1370/afm.1002  
32  
33
- 34 23. Boyce SL, Ibrahim LF, Connell T, et al. How many children who could be cared for  
35  
36 at home are being missed and why? Australasian Hospital-in-the-Home  
37  
38 Society Annual Conference. Melbourne, 2014.  
39  
40
- 41 24. Ibrahim LF, Hopper SM, Orsini F, et al. Efficacy and safety of intravenous  
42  
43 ceftriaxone at home versus intravenous flucloxacillin in hospital for children  
44  
45 with cellulitis (CHOICE): a single-centre, open-label, randomised, controlled,  
46  
47 non-inferiority trial. *The Lancet Infectious diseases* 2019;19(5):477-86. doi:  
48  
49 10.1016/S1473-3099(18)30729-1 [published Online First: 2019/03/12]  
50  
51
- 52 25. Ibrahim LF, Huang L, Hopper SM, et al. Intravenous ceftriaxone at home versus  
53  
54 intravenous flucloxacillin in hospital for children with cellulitis: a cost-  
55  
56  
57  
58  
59  
60

effectiveness analysis. *The Lancet Infectious diseases* 2019 doi:

10.1016/S1473-3099(19)30288-9 [published Online First: 2019/08/20]

26. Ibrahim LF, Babl FE, Orsini F, et al. Cellulitis: Home Or Inpatient in Children from the Emergency Department (CHOICE): protocol for a randomised controlled trial. *BMJ open* 2016;6(1):e009606. doi: 10.1136/bmjopen-2015-009606

27. Wynia MK, Sabin JE. Ethical challenges come home. *J Gen Intern Med* 2013;28(1):9-11. doi: 10.1007/s11606-012-2232-0

## Tables

Table 1. Responses to ethical questions (see text for full questions)

| Question                     | Responses<br>No. (%) | Vote results       |                        |
|------------------------------|----------------------|--------------------|------------------------|
|                              |                      | Ethical<br>No. (%) | Not ethical<br>No. (%) |
| 1. Home treatment            | 80 (100)             | 77 (96)            | 3 (4)                  |
| 2. Domestic violence         | 63 (79)              | 37 (59)            | 26 (41)                |
| 3. Parental respite          |                      |                    |                        |
| a. Maternal exhaustion       | 67 (84)              | 28 (42)            | 39 (58)                |
| b. Afford a family holiday   | 57 (71)              | 28 (49)            | 29 (51)                |
| c. Afford a wheelchair       | 64 (80)              | 28 (44)            | 36 (56)                |
| 4. Consent                   |                      |                    |                        |
| a. 14 years old              | 63 (79)              | 33 (52)            | 30 (48)                |
| b. 16 years old              | 58 (73)              | 48 (83)            | 10 (17)                |
| 5. Physiotherapy unavailable | 61 (76)              | 10 (16)            | 51 (84)                |
| 6. Bedroom sanctuary         | 64 (80)              | 63 (98)            | 1 (2)                  |
| 7. Intramuscular injections  |                      |                    |                        |
| a. 1 day                     | 62 (78)              | 61 (98)            | 1 (2)                  |
| b. 2 days                    | 59 (74)              | 52 (88)            | 7 (12)                 |
| c. 3 days                    | 60 (75)              | 31 (52)            | 29 (48)                |

1  
2  
3 **Figure legends**  
4

5 Figure 1. Proportion of participants who believe it is ethical to administer  
6 intramuscular (IM) injections at home by number of days  
7  
8  
9

10  
11  
12  
13  
14  
15  
16  
17  
18  
19  
20  
21  
22  
23  
24  
25  
26  
27  
28  
29  
30  
31  
32  
33  
34  
35  
36  
37  
38  
39  
40  
41  
42  
43  
44  
45  
46  
47  
48  
49  
50  
51  
52  
53  
54  
55  
56  
57  
58  
59  
60

Confidential: For Review Only

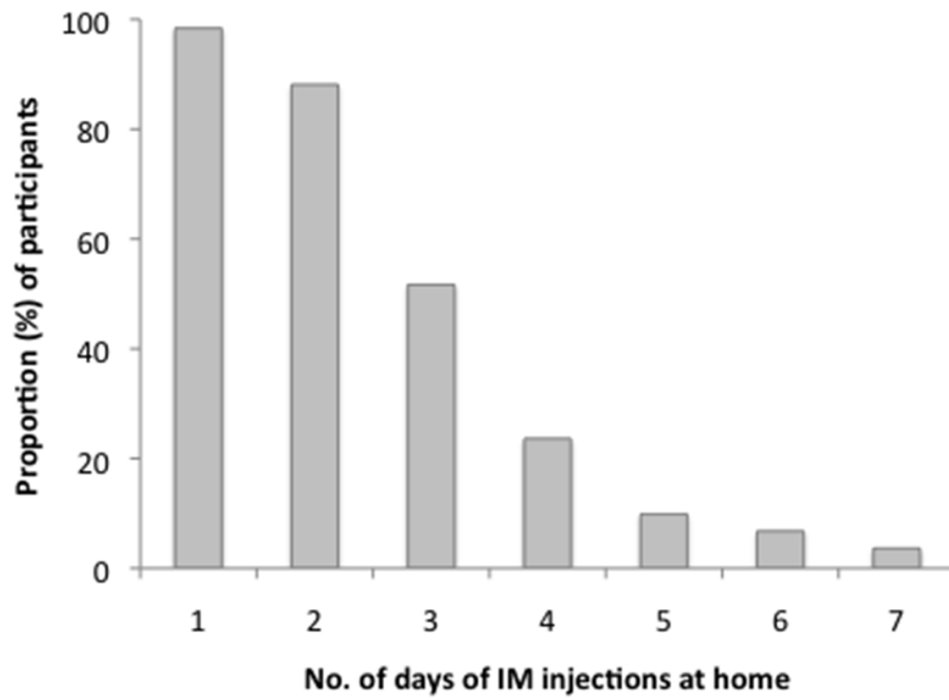



# BMJ Paediatrics Open

## Ethical dilemmas in providing acute medical care at home for children: a survey of health professionals

|                               |                                                                                               |
|-------------------------------|-----------------------------------------------------------------------------------------------|
| Journal:                      | <i>BMJ Paediatrics Open</i>                                                                   |
| Manuscript ID                 | bmjpo-2019-000590.R2                                                                          |
| Article Type:                 | Original research                                                                             |
| Date Submitted by the Author: | 18-Jan-2020                                                                                   |
| Complete List of Authors:     | Bryant, Penelope; The Royal Children's Hospital, General Medicine                             |
| Keywords:                     | Ethics, Adolescent Health, General Paediatrics, Health services research, Infectious Diseases |
|                               |                                                                                               |

SCHOLARONE™  
Manuscripts



I, the Submitting Author has the right to grant and does grant on behalf of all authors of the Work (as defined in the below author licence), an exclusive licence and/or a non-exclusive licence for contributions from authors who are: i) UK Crown employees; ii) where BMJ has agreed a CC-BY licence shall apply, and/or iii) in accordance with the terms applicable for US Federal Government officers or employees acting as part of their official duties; on a worldwide, perpetual, irrevocable, royalty-free basis to BMJ Publishing Group Ltd ("BMJ") its licensees and where the relevant Journal is co-owned by BMJ to the co-owners of the Journal, to publish the Work in this journal and any other BMJ products and to exploit all rights, as set out in our [licence](#).

The Submitting Author accepts and understands that any supply made under these terms is made by BMJ to the Submitting Author unless you are acting as an employee on behalf of your employer or a postgraduate student of an affiliated institution which is paying any applicable article publishing charge ("APC") for Open Access articles. Where the Submitting Author wishes to make the Work available on an Open Access basis (and intends to pay the relevant APC), the terms of reuse of such Open Access shall be governed by a Creative Commons licence – details of these licences and which [Creative Commons](#) licence will apply to this Work are set out in our licence referred to above.

Other than as permitted in any relevant BMJ Author's Self Archiving Policies, I confirm this Work has not been accepted for publication elsewhere, is not being considered for publication elsewhere and does not duplicate material already published. I confirm all authors consent to publication of this Work and authorise the granting of this licence.

1  
2  
3 **Ethical dilemmas in providing acute medical care at home for children: a survey**  
4  
5 **of health professionals**  
6  
7  
8  
9

10 Penelope A. Bryant, PhD<sup>1,2,3,4</sup>  
11  
12

13  
14  
15 1 Hospital-in-the-Home Department  
16

17 2 Infectious Diseases Unit, Department of General Medicine  
18

19 3 Clinical Paediatrics Group, Murdoch Children's Research Institute  
20

21 4 Department of Paediatrics, University of Melbourne  
22

23  
24 all at: The Royal Children's Hospital Melbourne, Australia  
25  
26  
27  
28

29 **Abstract word count:** 250  
30

31 **Manuscript word count:** 2,499  
32

33 **Keywords:** Hospital-in-the-Home, Hospital-at-Home, Medical Home, Outpatient  
34

35  
36 Parenteral Antibiotic Therapy, Ethics  
37  
38  
39  
40

41 **Corresponding author:**  
42

43 A/Prof Penelope Bryant  
44

45 Hospital-in-the-Home Department  
46

47 The Royal Children's Hospital Melbourne  
48

49 Parkville, VIC 3052  
50

51 Australia  
52

53  
54 Ph: +61393455522  
55

56  
57 Email: penelope.bryant@rch.org.au  
58  
59  
60

## ABSTRACT

**Objective:** Acute care at home is increasing. We aimed to determine the views of healthcare professionals on the ethics of providing home care and compare the impact of situational changes on their opinions.

**Design:** An analysis of opinions of home healthcare professionals.

**Setting:** The Australasian Hospital-in-the-Home Annual Conference, November 2017.

**Participants:** Eighty physicians, nurses and allied health staff who provide acute care for children and adults at home.

**Methods:** Clinical scenarios were presented about a 14-year-old receiving intravenous antibiotics at home via an established home care pathway, and participants were asked to vote manually on whether providing home care was ethical.

**Main Outcomes:** The proportions of healthcare professionals who believed that provision of home care was ethical in different situations.

**Results:** For each question the response rate ranged from 71-100%. While the provision of acute home care was deemed ethical by the majority (77/80, 96%), this decreased when other factors were involved such as domestic violence (37/63 (59%) OR 0.06 95%CI 0.02-0.20,  $p<0.001$ ) and, parental reluctance (28/67 (42%) OR 0.02 95%CI 0.008-0.09,  $p<0.001$ ). The age of consent affected the proportion who considered home care ethical against parental wishes: 16 years versus 14 years: OR 4.4 95% CI 1.9-10.1,  $p<0.001$ . The lowest proportion to consider home care ethical (16%) was when home care was deemed less than hospital care.

**Conclusions:** Home healthcare providers are supportive of the ethics of providing acute care at home for children, although differ amongst themselves with situational complexities. Applying the tenets of medical ethics (autonomy, non-maleficence,

1  
2  
3 beneficence and justice) can provide insights into the factors that may influence  
4  
5  
6 opinions.  
7  
8  
9  
10  
11  
12  
13  
14  
15  
16  
17  
18  
19  
20  
21  
22  
23  
24  
25  
26  
27  
28  
29  
30  
31  
32  
33  
34  
35  
36  
37  
38  
39  
40  
41  
42  
43  
44  
45  
46  
47  
48  
49  
50  
51  
52  
53  
54  
55  
56  
57  
58  
59  
60

Confidential: For Review Only

## INTRODUCTION

Care at home for acute medical conditions is increasingly viewed and used as a viable alternative to hospital admission<sup>1 2</sup>. The rationale applies to both patients and organisations. The majority of patients prefer to receive their care at home if possible, and have improved psychological outcomes and reduced risks associated with admission such as hospital-acquired infections<sup>3 4</sup>. For organisations, improved flow of patients and reduced costs make home care attractive<sup>5 6</sup>. There is evidence in adults that safety and efficacy are comparable between home and hospital care in selected patients and conditions<sup>7</sup>. While the evidence for safety and efficacy in acute conditions is scarcer in children, this too is accumulating<sup>8-11</sup>. However, while there is some literature around the ethics of treating children with chronic conditions at home<sup>12 13</sup>, the ethical aspects of treating children at home for acute conditions have not previously been explored.

Ethical behaviour has been considered in medicine since Hippocrates, and the International Code of Medical Ethics<sup>14</sup>, or variants, have been adopted by many national medical associations<sup>15-18</sup>. These are based on the four principles of medical ethics described by Beauchamp and Childress: autonomy, non-maleficence, beneficence and justice<sup>19</sup>.

We aimed to understand the views of clinical professionals who provide home care on various ethical aspects of managing children with acute medical conditions at home that would otherwise necessitate hospital admission. Acute home programs have names including hospital-in-the-home and medical home, whereby nursing, medical and allied health staff provide at least daily medical interventions in the

1  
2  
3 home including intravenous antibiotics, acute wound dressings, chemotherapy, and  
4  
5 physiotherapy. We aimed to determine the ethical parameters within which home  
6  
7 healthcare professionals believe they should be providing care to children at home.  
8  
9

## 10 11 12 **METHODS**

13  
14  
15 **Setting:** The Australasian Hospital-in-the-Home (HITH) Annual Conference  
16  
17 November 2017.

18  
19  
20 **Participants:** Medical, nursing and allied health staff attendees to the conference, all  
21  
22 of whom provide clinical services to patients at home.

23  
24  
25 **Design:** All attendees were invited to a session titled 'Ethical dilemmas in HITH  
26  
27 practice'. The intention to survey opinions on ethical matters was explained and  
28  
29 attendees were invited to leave the session if they wished, or stay and participate or  
30  
31 not as they wished. Nobody left but four attendees declined to participate.

32  
33  
34 Background was given on how ethical constructs can be used to explore practical  
35  
36 dilemmas. A non-clinical scenario was given to show there is often no right answer,  
37  
38 how ethical reasoning can be applied to either side of an argument, and that  
39  
40 increasing or changing available information can change how a situation is viewed  
41  
42 ethically. It was explained that several questions would be asked for which there was  
43  
44 no right answer and that the information they needed to make a fully informed  
45  
46 decision may not be there. For each question, participants could choose to vote or not,  
47  
48 and they were requested to hold up a blue sign if they thought the situation was  
49  
50 ethical and a red one if they thought not. To try to mitigate any feeling of peer  
51  
52 pressure to vote in a certain way, the signs were white on the back so the choice of  
53  
54 response was only visible from the front with all participants facing forward. Two  
55  
56 people counted votes and in case of discrepancy, a photograph was taken and  
57  
58  
59  
60

1  
2  
3 attendees were assured these would be destroyed after verification. The session used a  
4  
5 fictitious situation based on real dilemmas that arise in acute home care.  
6  
7

8 **Main Outcomes:** The proportion of healthcare professionals who believed that  
9  
10 provision of home care was ethical in different situations.  
11

12 **Statistical analysis:** Chi-square test was used to compare the proportion of  
13  
14 responses to different situational questions, with odds ratios (OR), 95% confidence  
15  
16 intervals (CI), and  $p < 0.05$  considered significant.  
17  
18

19 **Patient and public involvement:** There were no patients or members of the public  
20  
21 involved in any aspect of the study as it is an examination of opinions of clinical staff.  
22  
23

24 **Ethics approval:** This was not required due to the opinions belonging to the  
25  
26 healthcare staff and not associated with healthcare institutions and not involving  
27  
28 clinical care. The purpose of the session was clearly set out prior to starting and  
29  
30 participants were offered the opportunity to leave, or stay but not participate without  
31  
32 having to declare their non-participation. All data were anonymised and collated and  
33  
34 presented in aggregate.  
35  
36  
37  
38  
39

## 40 **RESULTS**

41  
42 The participants at the Australasian Hospital-in-the-Home Society Annual Conference  
43  
44 were predominantly from Australia and New Zealand and between the ages of 25 and  
45  
46 65 years. Their professional background was all in healthcare and all in home care,  
47  
48 with 70% nursing, 20% allied health (predominantly physiotherapists) and 10%  
49  
50 medical. A minority (5-10%) were directly involved in paediatric home care. Two  
51  
52 test questions ascertained the maximum number of voting participants and ensured  
53  
54 an understanding of the process – the first aiming to elicit an ‘ethical’ response and  
55  
56 the second a ‘not ethical’ response. 80/84 (95%) attendees participated, all of whom  
57  
58  
59  
60



1  
2  
3 voted 'ethical' for the first question and 'not ethical' for the second question. For the  
4  
5 clinical scenario, after each piece of additional information, participants were asked  
6  
7 to vote on 'Is it ethical to provide a home service for this patient in this situation?'

8  
9  
10 Response rates for each question ranged from 71-100%.

11  
12  
13  
14  
15 *Question 1. A 14-year-old girl with cystic fibrosis (CF) needs a planned episode of care*  
16  
17 *for an infective exacerbation. Your institution has a well-established home care*  
18  
19 *pathway for 'CF tune-ups' for adolescents with intravenous antibiotics and*  
20  
21 *physiotherapy. You offer her this home care pathway or hospital care and she chooses*  
22  
23 *home.*

24  
25  
26 Home care was voted as ethical by a very high proportion of participants (77 votes,  
27  
28 96%), all of whom work in home care and are therefore familiar with it (table 1).

29  
30  
31  
32  
33 *Question 2. You discover that there is a history of domestic violence between adults in*  
34  
35 *the household.*

36  
37  
38 Compared to the previous response, the proportion (37/63, 59%) who thought  
39  
40 providing a home service was ethical when domestic violence was involved was  
41  
42 significantly decreased (OR 0.06 95%CI 0.02-0.20,  $p < 0.001$ ).

43  
44  
45  
46  
47 *Question 3a. You determine there is no current risk to nursing staff. However, the girl's*  
48  
49 *mother tells you she is exhausted from chronic care of her child and was counting on*  
50  
51 *hospital admission for respite.*

52  
53  
54  
55 *3b. Her mother tells you if she doesn't get this respite, she will have to take unpaid leave*  
56  
57 *and won't be able to afford to take everyone on a family holiday.*

1  
2  
3 *3c. Her mother tells you if she doesn't get this respite, she will have to take unpaid leave*  
4 *and won't be able to afford to buy a wheelchair for her other child who has a disability.*

5  
6  
7  
8 Compared to the first response, the proportion (28/67, 42%) who thought providing  
9  
10 home care was ethical when the mother declared her reluctance due to exhaustion  
11  
12 was significantly decreased (OR 0.02 95%CI 0.008-0.09,  $p < 0.001$ ). Different reasons  
13  
14 for the respite request did not significantly affect the opinion on whether the care  
15  
16 was ethical compared to maternal exhaustion: to afford a family holiday: 49% versus  
17  
18 42%, OR 1.3 95%CI 0.7-2.7,  $p = 0.3$ ), or to buy a wheelchair: 44% versus 42%, OR 1.1  
19  
20 95%CI 0.5-2.1,  $p = 0.5$ ). Whether it was ethical to care for a child at home when the  
21  
22 request for respite hospitalisation was to pay for a family holiday had the lowest  
23  
24 response rate for all questions (71%).  
25  
26  
27  
28  
29  
30

31 *Question 4a. You are about to acquiesce to parental wishes, but the 14-year-old girl now*  
32 *insists that she wants to go home via HITH.*

33  
34  
35  
36 *4b. What if the girl was 16 years old?*

37  
38 There was a significant difference with patient age (without any further information)  
39  
40 about whether it was deemed ethical to provide home care per the patient's wishes  
41  
42 against parental wishes: 48/58 (83%) at 16 years versus 33/63 (52%) at 14 years  
43  
44 (OR 4.4 95% CI 1.9-10.1,  $p < 0.001$ ).  
45  
46  
47  
48  
49

50 *Question 5. Everyone now agrees to proceed with treatment at home. However, the*  
51 *home care physiotherapist will be away during the treatment period, so the girl and her*  
52 *parents will need to do her physiotherapy.*  
53  
54  
55  
56  
57  
58  
59  
60

1  
2  
3 Compared to the first response, the unavailability of physiotherapy led to the lowest  
4 proportion (10/61, 16%) of all questions of those who felt providing home care in  
5  
6 this scenario was ethical (OR 0.008 95%CI 0.002-0.03,  $p<0.001$ ).  
7  
8  
9

10  
11  
12 *Question 6. Your first visit to the home reveals a small apartment where the young girl's*  
13 *bedroom is her only sanctuary. This is currently full of medical equipment to facilitate*  
14 *her being at home.*  
15  
16  
17  
18

19 A high proportion of participants (63/64, 98%) voted that providing home care in  
20 this situation was ethical, with no difference from the original scenario (OR 2.5  
21  
22 95%CI 0.2-24.1,  $p=0.4$ ).  
23  
24  
25  
26  
27  
28

29 *Question 7a. Towards the end of her HITH stay her peripherally-inserted central*  
30 *catheter (PICC) blocks and you are unable to insert a cannula despite repeated*  
31 *attempts. The options are intramuscular injection or reinsertion of the PICC, for which*  
32 *she would need admission for a general anaesthetic. You decide to give an*  
33 *intramuscular injection so she can continue at home as she only needs one more day of*  
34 *parenteral antibiotics.*  
35  
36  
37  
38  
39  
40  
41  
42

43 *7b. Two days of intramuscular injections.*

44 *7c. Three days of intramuscular injections.*

45  
46  
47 As the number of days of intramuscular injections at home in preference to admission  
48 for PICC replacement increased, the proportion of participants that felt this was  
49  
50 ethical fell significantly (figure 1): 61/62 (98%) versus 31/60 (52%), OR 57 95%CI 7-  
51  
52 439,  $p<0.001$ ).  
53  
54  
55  
56  
57  
58

## 59 **DISCUSSION**

60

1  
2  
3 The application of ethical values to acute care for patients at home is a new area as  
4 home-based acute healthcare is in its relative infancy. The responses are those of  
5 health professionals who are all engaged in home healthcare, although predominantly  
6 in adults. The current model of care throughout Australia for paediatric acute non-  
7 inpatient services is for nurses to visit the child's home to deliver care: hospital-in-  
8 the-home rather than, for example, outpatient infusion services. The questions were  
9 designed to test various aspects of the four tenets of medical ethics in this clinical  
10 environment.  
11  
12  
13  
14  
15  
16  
17  
18  
19  
20  
21  
22  
23

24 Patient autonomy refers to respectful treatment of patients by ensuring disclosure of  
25 information and not constraining their right to make their own informed decision.  
26 This is exemplified in the first question where information is given to the patient and  
27 she decides between home care and hospital admission. The strong vote that this was  
28 ethical indicates that participants feel there is sufficient evidence that home care is  
29 effective and safe. Insufficient information is given to assess whether there was  
30 patient coercion, which is prohibited by the concept of autonomy, but on the face of it,  
31 the process appears ethical. The decision becomes less clear, as highlighted by the  
32 drop in 'ethical' votes, when the patient's mother's autonomy is included. This  
33 question also raised whether different reasons underpinning her autonomy  
34 (exhaustion, lack of funds) affect the ethical construct, but these were not viewed by  
35 participants as having as much impact as the mere fact of her opposing decision. In  
36 adult medicine, the patient's autonomy is paramount with the wishes of spouses and  
37 children being secondary<sup>20 21</sup>. In paediatrics, autonomy regarding medical care lies  
38 with those (usually the parent/s) holding parental rights, but the age at which the  
39 child's best interests are served by the child being autonomous is debated. More  
40  
41  
42  
43  
44  
45  
46  
47  
48  
49  
50  
51  
52  
53  
54  
55  
56  
57  
58  
59  
60

1  
2  
3 participants felt it was ethical for a 16-year-old to provide consent than a 14-year-old  
4  
5 and this may reflect some lack of familiarity with the care of younger mature  
6  
7 adolescents. The age at which a child can legally provide consent is different in  
8  
9 different countries. In the UK, the test of 'Gillick competence' allows a minor under  
10  
11 the legal age of consent (16 years) to be assessed as sufficiently mature to understand  
12  
13 and make their own decisions and provide consent. This is in line with the ethical  
14  
15 tenet of autonomy, which relies on competence. This medical case law has essentially  
16  
17 been adopted in Australia and Canada, although only sporadically in the USA.  
18  
19 Although adolescents in Australian and New Zealand hospitals are usually treated by  
20  
21 paediatric/adolescent teams, the current limited reach of paediatric homecare means  
22  
23 that many adolescents at home are looked after by adult homecare teams. The  
24  
25 responses to this question raise the important issue of the need for adult homecare  
26  
27 providers to be upskilled in the specific ethical aspects of care needs for adolescents.  
28  
29 However, even if consent is given by the adolescent, each home care service may have  
30  
31 its own rules about whether an adult also needs to be present, which may supersede  
32  
33 the ethical aspects of who ultimately provides consent.  
34  
35  
36  
37  
38  
39  
40  
41  
42

43 Non-maleficence refers to the duty to avoid causing harm including pain, suffering  
44  
45 and disablement. Beneficence refers to the duty to actively promote good for patients,  
46  
47 to defend their rights and to remove conditions that will cause harm. Although, they  
48  
49 are sometimes seen as two sides of the same coin, one can obey the dictates of non-  
50  
51 maleficence simply by refraining from acting, but beneficence requires positive  
52  
53 action. Several questions highlighted these dual tenets, essentially creating an ethical  
54  
55 dilemma, including provision of potentially invasive services in her place of  
56  
57 sanctuary: beneficence of active care provision for her health, but non-maleficence  
58  
59  
60

1  
2  
3 requires not to the detriment to her psyche. However, as long as the patient is fully  
4 informed and has consented, autonomy dictates that we should not be paternalistic.  
5  
6 Any detrimental effects may also differ between short episodes of acute care and  
7  
8 ongoing chronic care where medical equipment might be a permanent fixture. The  
9  
10 benefits and harms are also raised in the question on intramuscular injections, with  
11  
12 increasing number (and therefore pain) correlating with decreasing acceptance. This  
13  
14 adds a level of complexity when deciding on the ethical imperatives between the  
15  
16 three options of home care, intramuscular injections and the small but serious  
17  
18 potential harm of a general anaesthetic.  
19  
20  
21  
22  
23  
24  
25  
26

27 The issue of household domestic violence raises to whom the beneficence and non-  
28  
29 maleficence need to be applied. In this situation there is an obligation of specific  
30  
31 beneficence to the patient, and it potentially even increases the imperative for a  
32  
33 professional to visit the home. However, the ethical balance shifted for non-  
34  
35 responders when non-maleficence needed to be considered for a staff member  
36  
37 entering a potentially unsafe situation. Since there is a moral obligation to both, other  
38  
39 aspects should be considered to guide decision-making such as the vulnerability of  
40  
41 the individual and the risk of potential harm to either party, and for that more  
42  
43 information is required. It is, however, worth stating that it is rare for domestic  
44  
45 violence to be perpetrated against outsiders, and that the balance of most home  
46  
47 healthcare providers is to provide the care and, if necessary, have two staff members  
48  
49 visit together.  
50  
51  
52  
53  
54  
55  
56

57 Finally, justice refers to how benefits and burdens should be distributed. It mandates  
58  
59 the fair medical treatment of patients, with equal situations being treated equally, and  
60

1  
2  
3 unequal situations being treated in proportion to their inequalities. A large majority  
4  
5 of participants felt it was not just to provide inferior treatment at home compared to  
6  
7 what would be offered in hospital, reflecting the importance of physiotherapy in CF  
8  
9 care. This is important because the concern around home care being inferior is a  
10  
11 barrier to acute home care for many institutions and clinical staff<sup>22 23</sup>. Robust  
12  
13 evidence that home care is as efficacious and safe as hospital care for children is  
14  
15 increasing, but more is needed<sup>24</sup>. Of note, most home programs only provide daily  
16  
17 physiotherapy at home compared to twice daily in hospital, which is therefore  
18  
19 already less, yet this is considered acceptable by respiratory physicians. The concept  
20  
21 of 'good enough' has been discussed regarding parenting where perfection is not  
22  
23 deemed necessary. It may be appropriate to apply the same concept to home services  
24  
25 where the intensity of services is lower, but the quality must be as high. We did not  
26  
27 explore how good would be considered 'good enough' (eg physiotherapy via  
28  
29 telehealth, a physiotherapist visiting alternate days) or compare this with the risks of  
30  
31 inpatient admission. The other aspect is the balance of unequal situations. In a recent  
32  
33 study of home intravenous antibiotic treatment for cellulitis, it was shown that parent  
34  
35 and child quality of life was significantly higher at home and it cost three times less  
36  
37 for the family than in hospital<sup>24 25</sup>. The efficacy level (the primary outcome) for non-  
38  
39 inferiority was set lower for home than in hospital at the start of the trial<sup>26</sup> because of  
40  
41 the recognition of the benefits of home and acceptance of a proportionally lower level  
42  
43 of efficacy, although efficacy was actually found to be higher at home. Unequal  
44  
45 situations were tested in the question around maternal reasons for wanting her  
46  
47 daughter to have a hospital admission. That the lowest response rate was recorded  
48  
49 for whether saving for a family holiday was an ethical reason for not wanting  
50  
51 homecare may reflect the lack of paediatric healthcare professionals in the audience,  
52  
53  
54  
55  
56  
57  
58  
59  
60

1  
2  
3 as in paediatrics the child is considered within the holistic sphere of the family, and  
4  
5 family well-being is considered an important component .  
6  
7  
8  
9

10 Study limitations are that it only evaluated opinions of those providing home  
11 services, and while a high proportion of participants engaged, it was a small survey.  
12  
13 The majority predominantly provide care to adult patients, so would be less familiar  
14 with considering ethical aspects of paediatric care at home. The patient was chosen as  
15 an adolescent for this reason, but the answers around age of consent and parental  
16 respite may have been answered differently by hospital paediatricians and other  
17 healthcare providers. Additionally, because it was not completely anonymous (the  
18 technology was unavailable for electronic voting) people may have felt peer pressure  
19 to vote similarly. The mitigation for this was that the which way people voted (red or  
20 blue colour of vote) were only visible from the front and the participants were all  
21 facing forward. Additionally, the differences in proportions of votes for different  
22 questions suggest that this factor was not strong. One other limitation is that  
23 questions were limited to clinical dilemmas, and did not include other ethical  
24 dimensions to acute home care such as organisational issues (eg rationing or  
25 payment of services<sup>27</sup>) and research.  
26  
27  
28  
29  
30  
31  
32  
33  
34  
35  
36  
37  
38  
39  
40  
41  
42  
43  
44  
45  
46  
47

48 The tenets of medical ethics do not aim to provide answers, or even guidelines, for  
49 managing moral issues; rather they provide a framework to identify and reflect upon  
50 them. These results can provide a benchmark against which surveys of other groups  
51 regarding acute home care in children can be compared. The next important step will  
52 be to obtain the opinions of patients, families and other healthcare providers. The  
53 results show the relevance of considering ethical aspects of the provision of home  
54  
55  
56  
57  
58  
59  
60



1  
2  
3 care, both in building a service and in providing and constantly improving the quality  
4  
5 of delivering acute medical care to children at home.  
6  
7  
8  
9

### 10 **Acknowledgements**

11  
12 Thanks to those who participated in the survey and to Dr Suzanne Boyce for counting.

13  
14 A/Prof Bryant is in receipt of a Clinician Scientist Fellowship from the Murdoch

15  
16 Children's Research Institute, which had no role in any aspect of the study.  
17  
18  
19  
20  
21

22 **Conflicts of interest:** This study was not funded and there are no conflicts of interest  
23  
24 to declare.  
25  
26  
27  
28  
29  
30  
31  
32  
33  
34  
35  
36  
37  
38  
39  
40  
41  
42  
43  
44  
45  
46  
47  
48  
49  
50  
51  
52  
53  
54  
55  
56  
57  
58  
59  
60

### What is already known on this topic

- Children are increasingly managed at home for treatment of acute conditions that would traditionally require hospital admission
- There is emerging evidence for the efficacy and safety of this approach, but a lack of discussion on the ethical aspects.

### What this study adds

- Healthcare providers who are familiar with acute home care believe this care follows the ethical tenets of autonomy, beneficence, non-maleficence and justice.
- Ethical dilemmas arise when other people such as staff members and parents need to be considered.
- Provision of home care was felt to be least ethical when it was deemed inferior clinically to hospital care.

## References

1. Bryant PA, Hopper SM. Alternatives to ward admission from the emergency department. *J Paediatr Child Health* 2016;52(2):237-40. doi: 10.1111/jpc.13100 [published Online First: 2016/04/12]
2. Sartain SA, Maxwell MJ, Todd PJ, et al. Users' views on hospital and home care for acute illness in childhood. *Health & social care in the community* 2001;9(2):108-17.
3. Ibrahim LF, Hopper SM, Connell TG, et al. Evaluating an admission avoidance pathway for children in the emergency department: outpatient intravenous antibiotics for moderate/severe cellulitis. *Emerg Med J* 2017;34(12):780-85. doi: 10.1136/emermed-2017-206829 [published Online First: 2017/10/06]
4. Strandvik B, Hjelte L, Malmborg AS, et al. Home intravenous antibiotic treatment of patients with cystic fibrosis. *Acta Paediatr* 1992;81(4):340-4. doi: 10.1111/j.1651-2227.1992.tb12239.x [published Online First: 1992/04/01]
5. Warner BW, Kulick RM, Stoops MM, et al. An evidenced-based clinical pathway for acute appendicitis decreases hospital duration and cost. *Journal of Pediatric Surgery* 1998;33(9):1371-5.
6. Hensey C, Sett A, Connell T, et al. Missed opportunities for outpatient parenteral antibiotic therapy for bacterial meningitis and pyelonephritis in children. Australasian Hospital-in-the-Home Society Annual Conference. Melbourne, 2014.
7. Caplan GA, Sulaiman NS, Mangin DA, et al. A meta-analysis of "hospital in the home". *Med J Aust* 2012;197(9):512-9.
8. Ibrahim LF, Hopper SM, Babl FE, et al. Who Can Have Parenteral Antibiotics at Home?: A Prospective Observational Study in Children with Moderate/Severe

- 1  
2  
3 Cellulitis. *Pediatr Infect Dis J* 2016;35(3):269-74. doi:  
4  
5 10.1097/INF.0000000000000992  
6  
7
- 8 9. Raisch DW, Holdsworth MT, Winter SS, et al. Economic comparison of home-care-  
9  
10 based versus hospital-based treatment of chemotherapy-induced febrile  
11  
12 neutropenia in children. *Value in Health* 2003;6(2):158-66.  
13  
14
- 15 10. Hodgson KA, Huynh J, Ibrahim LF, et al. The use, appropriateness and outcomes of  
16  
17 outpatient parenteral antimicrobial therapy. *Arch Dis Child* 2016;101(10):886-  
18  
19 93. doi: 10.1136/archdischild-2015-309731  
20  
21
- 22 11. Scanlan BT, Ibrahim LF, Hopper SM, et al. Selected Children With Complicated  
23  
24 Acute Urinary Tract Infection May Be Treated With Outpatient Parenteral  
25  
26 Antibiotic Therapy at Home Directly From the Emergency Department. *Pediatr*  
27  
28 *Infect Dis J* 2019;38(2):e20-e25. doi: 10.1097/INF.0000000000002070  
29  
30 [published Online First: 2018/04/11]  
31  
32
- 33 12. Manhas KP, Mitchell I. Children with complex care needs going home: The  
34  
35 relevance of ethical ideas of proximity. *Paediatr Child Health* 2009;14(6):369-  
36  
37 70.  
38  
39
- 40 13. Simonds AK. Respiratory support for the severely handicapped child with  
41  
42 neuromuscular disease: ethics and practicality. *Semin Respir Crit Care Med*  
43  
44 2007;28(3):342-54. doi: 10.1055/s-2007-981655  
45  
46
- 47 14. Anonymous. World Medical Association International Code of Medical Ethics:  
48  
49 World Medical Association, 2006.  
50  
51
- 52 15. Anonymous. Code of Ethics of the Canadian Medical Association: Canadian  
53  
54 Medical Association, 1996.  
55  
56
- 57 16. Anonymous. American Medical Association Code of Medical Ethics - updated  
58  
59 2016: American Medical Association, 2001.  
60

- 1  
2  
3 17. Anonymous. Australian Medical Association Code of Ethics: Australian Medical  
4  
5 Association, 2006.  
6  
7
- 8 18. Anonymous. Good Medical Practice: General Medical Council UK, 2014.  
9
- 10 19. Beauchamp TL, Childress J. Principles of biomedical ethics. New York: Oxford  
11  
12 University Press 2009.  
13
- 14 20. Carrese JA. Refusal of care: patients' well-being and physicians' ethical  
15  
16 obligations: "but doctor, I want to go home". *JAMA* 2006;296(6):691-5. doi:  
17  
18 10.1001/jama.296.6.691  
19
- 20 21. DeWolf Bosek MS, Cashman GS. Ethical obligations and concerns when trying to  
21  
22 achieve a patient's wishes: ethics consultation. *JONAS Healthc Law Ethics Regul*  
23  
24 2008;10(3):76-7. doi: 10.1097/01.NHL.0000300790.90014.d6  
25  
26  
27
- 28 22. Nutting PA, Miller WL, Crabtree BF, et al. Initial lessons from the first national  
29  
30 demonstration project on practice transformation to a patient-centered  
31  
32 medical home. *Ann Fam Med* 2009;7(3):254-60. doi: 10.1370/afm.1002  
33  
34
- 35 23. Boyce SL, Ibrahim LF, Connell T, et al. How many children who could be cared for  
36  
37 at home are being missed and why? Australasian Hospital-in-the-Home  
38  
39 Society Annual Conference. Melbourne, 2014.  
40  
41
- 42 24. Ibrahim LF, Hopper SM, Orsini F, et al. Efficacy and safety of intravenous  
43  
44 ceftriaxone at home versus intravenous flucloxacillin in hospital for children  
45  
46 with cellulitis (CHOICE): a single-centre, open-label, randomised, controlled,  
47  
48 non-inferiority trial. *The Lancet Infectious diseases* 2019;19(5):477-86. doi:  
49  
50 10.1016/S1473-3099(18)30729-1 [published Online First: 2019/03/12]  
51  
52  
53
- 54 25. Ibrahim LF, Huang L, Hopper SM, et al. Intravenous ceftriaxone at home versus  
55  
56 intravenous flucloxacillin in hospital for children with cellulitis: a cost-  
57  
58  
59  
60

effectiveness analysis. *The Lancet Infectious diseases* 2019 doi:

10.1016/S1473-3099(19)30288-9 [published Online First: 2019/08/20]

26. Ibrahim LF, Babl FE, Orsini F, et al. Cellulitis: Home Or Inpatient in Children from the Emergency Department (CHOICE): protocol for a randomised controlled trial. *BMJ open* 2016;6(1):e009606. doi: 10.1136/bmjopen-2015-009606

27. Wynia MK, Sabin JE. Ethical challenges come home. *J Gen Intern Med* 2013;28(1):9-11. doi: 10.1007/s11606-012-2232-0

## Tables

Table 1. Responses to ethical questions (see text for full questions)

| Question                     | Responses<br>No. (%) | Vote results       |                        |
|------------------------------|----------------------|--------------------|------------------------|
|                              |                      | Ethical<br>No. (%) | Not ethical<br>No. (%) |
| 1. Home treatment            | 80 (100)             | 77 (96)            | 3 (4)                  |
| 2. Domestic violence         | 63 (79)              | 37 (59)            | 26 (41)                |
| 3. Parental respite          |                      |                    |                        |
| a. Maternal exhaustion       | 67 (84)              | 28 (42)            | 39 (58)                |
| b. Afford a family holiday   | 57 (71)              | 28 (49)            | 29 (51)                |
| c. Afford a wheelchair       | 64 (80)              | 28 (44)            | 36 (56)                |
| 4. Consent                   |                      |                    |                        |
| a. 14 years old              | 63 (79)              | 33 (52)            | 30 (48)                |
| b. 16 years old              | 58 (73)              | 48 (83)            | 10 (17)                |
| 5. Physiotherapy unavailable | 61 (76)              | 10 (16)            | 51 (84)                |
| 6. Bedroom sanctuary         | 64 (80)              | 63 (98)            | 1 (2)                  |
| 7. Intramuscular injections  |                      |                    |                        |
| a. 1 day                     | 62 (78)              | 61 (98)            | 1 (2)                  |
| b. 2 days                    | 59 (74)              | 52 (88)            | 7 (12)                 |
| c. 3 days                    | 60 (75)              | 31 (52)            | 29 (48)                |

1  
2  
3 **Figure legends**  
4

5 Figure 1. Proportion of participants who believe it is ethical to administer  
6 intramuscular (IM) injections at home by number of days  
7  
8  
9

10  
11  
12  
13  
14  
15  
16  
17  
18  
19  
20  
21  
22  
23  
24  
25  
26  
27  
28  
29  
30  
31  
32  
33  
34  
35  
36  
37  
38  
39  
40  
41  
42  
43  
44  
45  
46  
47  
48  
49  
50  
51  
52  
53  
54  
55  
56  
57  
58  
59  
60

Confidential: For Review Only





Supplement: bmjpo-2019-000590.draft_revisions.pdf [file bmjpo-2019-000590.draft_revisions.pdf]
